1 **Rapid adaptation to Elevated Extracellular Potassium in the**  
2 **Pyloric Circuit of the Crab, *Cancer borealis***

3 Abbreviated title: Loss and recovery of circuit activity in high [K<sup>+</sup>]

4 Lily S. He<sup>\*†</sup>, Mara C.P. Rue<sup>\*</sup>, Ekaterina O. Morozova<sup>\*</sup>, Daniel J. Powell, Eric J. James<sup>+</sup>,  
5 Manaswini Kar<sup>°</sup>, and Eve Marder

6

7 Biology Department and Volen Center, Brandeis University, Waltham, MA 02454

8 † Program in Neuroscience, Harvard University, Boston, MA 02115

9 + Biology Department, Adelphi University, Garden City, NY 11530

10 ° Department of Neurobiology, University of Pittsburgh, Pittsburgh, PA 15213

11 \* these authors contributed equally to this work

12 Corresponding author: Eve Marder: [marder@brandeis.edu](mailto:marder@brandeis.edu)

13

14 Number of pages: 43

15 Number of figures: 8

16 Abstract: 213 words

17 Introduction: 392 words

18 Discussion: 1499 words

19

20 The authors declare no conflicts of interest.

21 Acknowledgments: Supported by NIH R35 NS097343 and R90 DA033463. The authors  
22 thank Daniel Shin for assistance with dissections, and Dr. Stephen Van Hooser for

23 statistical advice. Drs. Sonal Kedia and Jason Pipkin gave us comments on the  
24 manuscript.

25 **Abstract**

26 Elevated  $[K^+]$  is often used to alter excitability in neurons and networks by shifting the  
27 potassium equilibrium potential ( $E_K$ ) and, consequently, the resting membrane  
28 potential. We studied the effects of increased extracellular  $[K^+]$  on the well-described  
29 pyloric circuit of the crab, *Cancer borealis*. A 2.5-fold increase in extracellular  $[K^+]$   
30 ( $2.5x[K^+]$ ) depolarized Pyloric Dilator (PD) neurons and resulted in short-term loss of  
31 their normal bursting activity. This period of silence was followed within 5-10 minutes  
32 by the recovery of spiking and/or bursting activity during continued superfusion of  
33  $2.5x[K^+]$  saline. In contrast, when PD neurons were pharmacologically isolated from  
34 pyloric presynaptic inputs, they exhibited no transient loss of spiking activity in  
35  $2.5x[K^+]$ , suggesting the presence of an acute inhibitory effect mediated by circuit  
36 interactions. Action potential threshold in PD neurons hyperpolarized during an hour-  
37 long exposure to  $2.5x[K^+]$  concurrent with the recovery of spiking and/or bursting  
38 activity. Thus, the initial loss of activity appears to be mediated by synaptic interactions  
39 within the network, but the secondary adaptation depends on changes in the intrinsic  
40 excitability of the pacemaker neurons. The complex sequence of events in the responses  
41 of pyloric neurons to elevated  $[K^+]$  demonstrates that electrophysiological recordings  
42 are necessary to determine both the transient and longer-term effects of even modest  
43 alterations of  $K^+$  concentrations on neuronal activity.

44 **Significance Statement**

45 Solutions with elevated extracellular potassium are commonly used as a depolarizing  
46 stimulus. Moreover, hyperkalemia is associated with a number of disease states,  
47 including epileptic seizures and brain traumas. We studied the effects of high  $[K^+]$  saline  
48 on the well-described pyloric circuit of the crab stomatogastric ganglion. A 2.5-fold  
49 increase in extracellular  $[K^+]$  led to a transient loss of activity in pyloric neurons that  
50 was not due to depolarization block. This was followed by a rapid increase in excitability  
51 and concurrent recovery of spiking and rhythmic bursting activity within minutes. These  
52 results suggest that effects of high  $[K^+]$  on neuronal circuits can be complex and non-  
53 stationary.

## 54 **Introduction**

55           Neuronal circuits must be robust to various environmental challenges. This is  
56 especially true for central pattern generators (CPGs) that produce essential motor  
57 patterns such as breathing, walking, and chewing (Marder and Calabrese, 1996).  
58 Maintaining stability over a range of perturbations involves multiple intrinsic and  
59 synaptic mechanisms that operate over the course of minutes to days (Von Euler, 1983;  
60 Marder and Bucher, 2001; Harris-Warrick, 2010). Moreover, both theoretical and  
61 experimental evidence suggest that robust CPGs with similar activity patterns can have  
62 widely variable underlying cell intrinsic and synaptic conductances (Prinz et al., 2004;  
63 Marder and Goaillard, 2006; Schulz et al., 2006; Schulz et al., 2007; Goaillard et al.,  
64 2009; Norris et al., 2011; Roffman et al., 2011). Nevertheless, these individually variable  
65 circuits must maintain reliable outputs. How such circuits respond and adapt to  
66 environmental challenges remains an open question.

67           There are a number of global perturbations such as changes in temperature or pH  
68 that are likely to influence the behavior of most, if not all, neurons in a circuit. Previous  
69 work on the pyloric circuit of the crab stomatogastric ganglion (STG) has shown that the  
70 pyloric rhythm is remarkably resilient to substantial changes in temperature (Tang et  
71 al., 2010) or pH (Haley et al., 2018). Elevated extracellular potassium concentration  
72 ( $[K^+]$ ) is a physiologically relevant depolarizing stimulus associated with a wide array of  
73 conditions including thermal stress, epileptic seizures, kidney failure, traumatic brain  
74 injury, and stroke (Baylor and Nicholls, 1969; Katayama et al., 1990; Pérez-Pinzón et al.,  
75 1995; Jensen and Yaari, 1997; Rodgers et al., 2007; Krishnan and Kiernan, 2009;  
76 Morrison III et al., 2011; Arnold et al., 2014; Chauvette et al., 2016).

77 Experimentally, increased extracellular  $[K^+]$  is often used to depolarize neurons  
78 and networks, with the usual aim of increasing neuronal and network activity (Ballerini  
79 et al., 1999; Lin et al., 2008; Panaitescu et al., 2009; Ruangkittisakul et al., 2011; Rybak  
80 et al., 2014; Sharma et al., 2015). In this study, we describe a series of short and longer-  
81 term effects of elevated  $[K^+]$  on the pyloric circuit of the STG. In elevated  $[K^+]$ , we  
82 observe a short-term period (several minutes) in which rhythmic network activity is lost  
83 or slowed, followed by a period of adaptation in which rhythmic activity returns while  
84 still in elevated  $[K^+]$ . These results demonstrate that the effects of high  $[K^+]$  on neurons  
85 and networks can be complex and non-stationary.  
86

## 87 **Materials and Methods**

### 88 Animals and dissections

89 Adult male Jonah Crabs, *Cancer borealis*, (N = 81) were obtained from Commercial  
90 Lobster (Boston, MA) between December 2016 and December 2019 and maintained in  
91 artificial seawater at 10-12 °C in a 12-hour light/dark cycle. On average, animals were  
92 acclimated at this temperature for one week before use. Prior to dissection, animals  
93 were placed on ice for at least 30 minutes. Dissections were performed as previously  
94 described (Gutierrez and Grashow, 2009). In short, the stomach was dissected from the  
95 animal and the intact stomatogastric nervous system (STNS) was removed from the  
96 stomach including the commissural ganglia, esophageal ganglion and stomatogastric  
97 ganglion (STG) with connecting motor nerves. The STNS was pinned in a Sylgard-  
98 coated (Dow Corning) dish and continuously superfused with 11 °C saline.

### 99 Solutions

100 Physiological (control) *Cancer borealis* saline was composed of 440 mM NaCl, 11 mM  
101 KCl, 26 mM MgCl<sub>2</sub>, 13 mM CaCl<sub>2</sub>, 11 mM Trizma base, 5 mM maleic acid, pH 7.4-7.5 at  
102 23 °C (approximately 7.7-7.8 pH at 11 °C). High - 1.5x, 2x, 2.5x, and 3x[K<sup>+</sup>] - salines (16.5,  
103 22, 27.5 and 33mM KCl respectively) were prepared by adding more KCl salt to the  
104 normal saline. 10<sup>-5</sup>M Picrotoxin (PTX) was used to block inhibitory glutamatergic  
105 synapses (Marder and Eisen, 1984). 10<sup>-7</sup>M Tetrodotoxin (TTX) was used to block  
106 voltage-gated sodium channels for measurements of graded inhibition.

### 107 Electrophysiology

108 Intracellular recordings from STG somata were made in the desheathed STG with 10–30  
109 MΩ sharp glass microelectrodes filled with internal solution (10 mM MgCl<sub>2</sub>, 400 mM  
110 potassium gluconate, 10 mM HEPES buffer, 15 mM NaSO<sub>4</sub>, 20 mM NaCl (Hooper et al.,

111 2015)). Intracellular signals were amplified with an Axoclamp 900A amplifier  
112 (Molecular Devices, San Jose). Extracellular nerve recordings were made by building  
113 wells around nerves using a mixture of Vaseline and mineral oil and placing stainless-  
114 steel pin electrodes within the wells to monitor spiking activity. Extracellular nerve  
115 recordings were amplified using model 3500 extracellular amplifiers (A-M Systems).  
116 Data were acquired using a Digidata 1440 digitizer (Molecular Devices, San Jose) and  
117 pClamp data acquisition software (Molecular Devices, San Jose, version 10.5). For  
118 identification of Pyloric Dilator (PD) and Lateral Pyloric (LP) neurons, somatic  
119 intracellular recordings were matched to action potentials on the pyloric dilator nerve  
120 (*pdn*), lateral pyloric nerve (*lpn*) and/or the lateral ventricular nerve (*lvn*).

#### 121 Elevated [K<sup>+</sup>] saline application

122 Prior to applications of elevated [K<sup>+</sup>] saline, baseline activity was recorded for 30  
123 minutes in control saline. Following the baseline recording, the STNS was superfused  
124 with elevated [K<sup>+</sup>] saline in concentrations ranging from 1.5x to 3x [K<sup>+</sup>] for 90 minutes.  
125 The preparation was then superfused with control saline for 30 minutes. Recordings  
126 from PD neurons in the isolated pacemaker kernel were made by superfusing the  
127 preparation with 10<sup>-5</sup>M Picrotoxin (PTX) saline until the inhibitory synaptic potentials  
128 in the PD neurons disappeared (20 minutes). These preparations were then exposed to  
129 2.5x[K<sup>+</sup>] PTX saline for 90 minutes, followed by a 30-minute wash in PTX saline.

#### 130 Measuring synaptic strength between LP and PD neurons

131 We measured the strength of graded synaptic inhibition from the LP neuron onto PD  
132 neurons and from the PD neuron onto LP neurons in physiological saline with 10<sup>-7</sup> M  
133 TTX and over time in 2.5x[K<sup>+</sup>] TTX saline. The synaptic currents were measured using  
134 two different protocols: voltage clamp and current clamp.



135 Voltage clamp protocol: The LP neuron and a PD neuron were both held in two-  
136 electrode voltage clamp. The synaptic current from the LP neuron to the PD neuron was  
137 measured as the current elicited in the postsynaptic neuron, held at either -90mV or -  
138 10mV, in response to depolarizing the presynaptic neuron to -10mV for 1-second steps.  
139 The synaptic current was measured at the peak of the postsynaptic response. The  
140 reversal potential of the synaptic current was estimated by fitting a line to the peak  
141 postsynaptic currents at -90mV and -10 mV. The synaptic current from the PD neuron  
142 to the LP neuron was measured as the current elicited in the postsynaptic neuron, held  
143 at -50 mV, in response to depolarizing the presynaptic neuron to -10mV.  
144 These measurements were repeated every 5 minutes for the entire experiment, which  
145 consisted of a 30-minute baseline in  $10^{-7}$ M TTX saline followed by 60 minutes in  
146  $2.5x[K^+]$  TTX saline and finally a 30-minute wash in TTX saline.  
147 Current clamp protocol: We used two-electrode current clamp to inject a series of ten 2-  
148 second current steps into the LP neuron from -50mV up to -20mV while simultaneously  
149 recording from a PD neuron held at -50mV. These current steps were repeated every 3  
150 minutes for the entire experiment. We recorded the synaptic responses for 30 minutes  
151 in TTX saline. The preparation was then superfused with  $2.5x[K^+]$  TTX saline for 90  
152 minutes, followed by a 30-minute wash in TTX saline.

### 153 Threshold and excitability measurements

154 To measure the action potential threshold and excitability of PD neurons, two-electrode  
155 current clamp was used to apply slow ramps of current from -4nA to +2nA over 60  
156 seconds. Resting membrane potential and input resistance were measured during  
157 baseline recordings and after the application of elevated  $[K^+]$  to ensure the integrity of  
158 the preparation (neurons with input resistance  $<4M\Omega$  were discarded). Three ramps

159 were performed during baseline recordings at 10-minute intervals, and ramps were  
160 performed in 2.5x[K<sup>+</sup>] at 5, 10, 20, 30, 40, 50, 60, 70, 80 and 90 minutes after the start  
161 of elevated [K<sup>+</sup>] superfusion. After the preparation was returned to control saline, three  
162 ramps were performed again at 10-minute intervals. In recordings from the PD neurons  
163 with glutamatergic synapses blocked by PTX, baseline ramps were performed as  
164 described above, followed by three ramps in PTX saline. Preparations were then  
165 superfused with 2.5x[K<sup>+</sup>] PTX saline and washed in PTX saline following the same ramp  
166 procedure.

### 167 Data acquisition and analysis

168 Recordings were acquired using Clampex software (pClamp Suite by Molecular Devices,  
169 San Jose, version 10.5) and visualized and analyzed using custom MATLAB analysis  
170 scripts. These scripts were used to detect and measure voltage response amplitudes and  
171 membrane potentials, plot raw recordings and processed data, generate spectrograms,  
172 and perform some statistical analyses.

### 173 Spectral analysis

174 Spectrograms were calculated using the Burg (1967) method for estimation of the power  
175 spectrum density in each time-window. The Burg method (1967) fits the autoregressive  
176 (AR) model of a specified order  $p$  in the time series by minimizing the sum of squares of  
177 the residuals. The fast-Fourier transform (FFT) spectrum is estimated using the  
178 previously calculated AR coefficients. This method is characterized by higher resolution  
179 in the frequency domain than traditional FFT spectral analysis, especially for a relatively  
180 short time window (Buttkus, 2000). We used the following parameters for the spectral  
181 estimation: data window of 3.2 s, 50% overlap to calculate the spectrogram, number of  
182 estimated AR-coefficients  $p=(\text{window}/4)+1$ . Before the analysis, voltage traces were low

183 pass filtered at 5 Hz using a six-order Butterworth filter and down-sampled. PD neuron  
184 burst frequency was calculated as the mean frequency at the peak spectral power in each  
185 sliding window.

#### 186 *Analysis of interspike interval distributions*

187 Intracellular voltage traces were thresholded to obtain spike times. Distributions of  
188 inter-spike intervals (ISIs) were calculated within 2-minute bins. Hartigan's dip test of  
189 unimodality (Hartigan and Hartigan, 1985) was used to obtain the dip statistic for each  
190 of these distributions. This dip statistic was compared to Table 1 in Hartigan and  
191 Hartigan (1985) to find the probability of multi-modality. The test creates a unimodal  
192 distribution function that has the smallest value deviations from the experimental  
193 distribution function. The largest of these deviations is the dip statistic. The dip statistic  
194 shows the probability of the experimental distribution function being bimodal. Larger  
195 value dips indicate that the empirical data are more likely to have multiple modes  
196 (Hartigan and Hartigan, 1985).

#### 197 *Activity pattern plots*

198 For all recordings, we determined the time of spikes over the course of the experiment.  
199 For the recovery time plots, silence was defined as no more than 2 spikes in a 30-second  
200 sliding window. Otherwise, all spike behaviors (even if irregular) were counted as active  
201 spiking.

202 To determine more broadly the activity pattern of each PD neuron across the  
203 experiment, we analyzed the distribution of log-transformed ISIs in 2-minute bins using  
204 Hartigan's dip statistic. If the dip statistic was 0.05 or higher the neuron was considered  
205 to be bursting. If the dip statistic was lower than 0.05 the neuron was considered to be  
206 tonically firing. Neurons with some spikes, but not enough ISIs to calculate the dip, were

207 classified as sparsely firing. Neurons with no spikes in the observed window were  
208 classified as silent. We then plotted the activity patterns in these four categories –  
209 bursting, tonic, sparse firing and silent – for each PD neuron across the entire  
210 experiment.

### 211 *Identification of the spike threshold*

212 The spike threshold was identified as the voltage point of the maximum curvature before  
213 the first spike. To find this, we calculated the first derivative of the voltage ( $dV/dt$ ) and  
214 defined the spike onset as the point when  $dV/dt$  crosses the threshold value of 10  
215 mV/ms.

216 All electrophysiology analysis scripts are available at the Marder lab GitHub  
217 (<https://github.com/marderlab>).

### 218 *Statistics*

219 Statistical analysis was carried out using Excel 365 for ANOVA tests, and MATLAB  
220 2018a for all other analyses as described above.

## 221 **Results**

### 222 ***Network activity in the pyloric circuit***

223           The STNS of the crab *Cancer borealis* was isolated intact from the stomach and  
224 pinned in a dish, allowing us to change the composition of the continuously flowing  
225 superfused saline (Fig. 1A). The STG contains identified neurons that drive the pyloric  
226 rhythm which filters food through the animal's foregut. Figure 1B shows a recording  
227 from the lateral ventricular nerve (*lvn*) which contains the axons of the LP, pyloric (PY)  
228 and PD neurons; the stereotypical triphasic pyloric pattern consists of repeated bursts of  
229 activity from the LP, PY and PD neurons. Figure 1C illustrates the connectivity diagram  
230 of the pyloric network. The anterior burster (AB) neuron, the intrinsic oscillator that  
231 drives the circuit, is strongly electrically coupled to the two PD neurons, which burst  
232 synchronously with the AB neuron. Together the AB and two PD neurons form the  
233 pacemaker kernel of the network, and their coordinated bursting initiates each triphasic  
234 cycle (Maynard, 1972). Glutamatergic and cholinergic synaptic connections between  
235 neurons in the STG are all inhibitory and are both graded and spike mediated (Graubard  
236 et al., 1980; Manor et al., 1997). LP and PY neurons' bursting activity, which results  
237 from post-inhibitory rebound, compose the second and third phases of the pyloric  
238 rhythm respectively, due to rhythmic inhibition from the pacemaker and reciprocal  
239 inhibition between LP and PY. (Hartline and Gassie, 1979; Selverston and Miller, 1980).

240

### 241 ***The pyloric rhythm is temporarily disrupted by high extracellular*** 242 ***potassium***

243           To test the response of the pyloric rhythm to changes in extracellular [K<sup>+</sup>], we  
244 superfused saline with elevated [K<sup>+</sup>] over the STNS while continuously recording the

245 activity of pyloric neurons extracellularly from the *lvn*. We tested concentrations of  $[K^+]$   
246 that were 1.5, 2, 2.5 and 3-times the physiological concentrations to study the dose-  
247 dependent responses of pyloric neurons to changes in extracellular  $[K^+]$ . When  
248 extracellular  $[K^+]$  was increased to 1.5x the physiological concentration (Fig. 1D, N = 4),  
249 the pyloric rhythm remained triphasic and was negligibly affected. When exposed to 2x  
250  $[K^+]$  (Fig. 1E, N = 20), the response of pyloric neurons was more variable. In some cases  
251 (N = 9/20) there was a short disruption of the triphasic pyloric rhythm, which was  
252 followed by the recovery of spiking activity.

253 Higher concentrations of extracellular  $[K^+]$  produced more pronounced effects on  
254 pyloric activity. 2.5x  $[K^+]$  (Fig. 1F, N = 12 extracellular only recordings) reliably and  
255 profoundly altered the pyloric rhythm. During the application of 2.5x $[K^+]$  saline, all  
256 preparations exhibited a disruption of action potentials from pyloric neurons, followed  
257 by recovery of spiking activity during continued exposure to 2.5x $[K^+]$  saline. Application  
258 of 3x $[K^+]$  saline to the STNS resulted in consistent loss of the pyloric rhythm (Fig. 1G, N  
259 = 5). Nonetheless, at 3x $[K^+]$ , few of the preparations recovered sustained activity. Based  
260 on these responses, we settled on 2.5x $[K^+]$  for further study, as it reliably disrupted the  
261 pyloric rhythm and was accompanied by a sustained recovery of spiking or bursting  
262 activity during the continued application of 2.5x $[K^+]$  saline.

263 The pattern of loss and recovery of pyloric activity in 2.5x $[K^+]$  saline was  
264 consistent across all experiments. To obtain more detailed information on the effects of  
265 increased  $[K^+]$ , we recorded intracellularly from pyloric neurons while superfusing  
266 2.5x $[K^+]$  saline.

267

268 ***PD and LP neurons depolarize and temporarily lose spiking activity in***  
269 ***high extracellular potassium***

270 Intracellular recordings showed a marked loss of spiking activity from pyloric  
271 neurons (crash) in response to the application of 2.5x[K<sup>+</sup>] saline, in agreement with the  
272 previously described extracellular recordings. In the representative example shown in  
273 Figure 2, the PD and LP neurons fired bursts robustly in normal physiological saline  
274 (Fig. 2*Ai*). Within a few minutes of the start of 2.5x[K<sup>+</sup>] saline application, the minimum  
275 membrane potentials of the PD and LP neurons depolarized by 15 and 22mV  
276 respectively (Fig. 2*Aii*), coincident with a reduction in firing frequency. Subsequently,  
277 the activity of both the LP and PD neurons became more burst-like over the course of  
278 the 90-minute application of 2.5x[K<sup>+</sup>] saline (Fig. 2*Aiii-iv*) and recovered to normal  
279 baseline behavior when returned to physiological saline (Fig. 2*Av*).

280 The full pattern of depolarization and recovery of spiking can be seen by plotting  
281 time-condensed voltage traces for the PD neuron (the response of the LP neuron closely  
282 resembles that of the PD neuron) for the entire 150-minute experiment. In this trace,  
283 the membrane potential initially depolarized in 2.5x[K<sup>+</sup>] saline and was followed by a  
284 loss of spiking activity (Fig. 2*B*). To visualize spiking behavior over the course of the  
285 experiment, we plotted the instantaneous interspike intervals (ISIs) of the PD neuron  
286 for the whole experiment on a log scale ( $\log_{10}(\text{ISI})$ , Fig. 2*C*). All healthy PD neurons in  
287 control saline had regular bursting activity that yielded a bimodal distribution of ISIs,  
288 reflecting the relatively longer ISI period between bursts and the shorter ISIs of spikes  
289 within a burst (Fig. 2*C*). Over the course of the 2.5x[K<sup>+</sup>] saline application, both the PD  
290 and LP neurons recovered rhythmic bursts of action potentials, which is clear from the  
291 re-emergence of two ISI bands (Fig. 2*C*).

292 Bursting activity is suggestive of the re-appearance of slow membrane potential  
293 oscillations. These slow oscillations are well visualized in spectrograms of the neuron's  
294 membrane potential. Recovery of bursting activity in elevated  $[K^+]$  saline can be seen as  
295 the re-appearance of a strong frequency band at 1-2Hz in the voltage spectrogram (Fig.  
296 *2D*).

297 We calculated the most hyperpolarized point of the membrane potential in each  
298 burst averaged over five-minute bins for all PD neurons to study the depolarizing effect  
299 of  $2.5x[K^+]$  saline over time. PD neurons depolarized upon application of  $2.5x[K^+]$  saline  
300 and remained depolarized for the duration of the application (Fig. *2E*). Figure *2F* shows  
301 pooled data from these experiments, PD neurons depolarized upon application of  
302  $2.5x[K^+]$  saline (Fig. *2F*, one-way repeated measures ANOVA,  $F(26,312) = 152.43$ ,  
303 Tukey post-hoc, all  $p < 0.05$ , average depolarization after 10 minutes,  $14.5 \pm 3.3mV$ )  
304 After the initial change in the first 10 minutes in  $2.5x[K^+]$ , the minimum membrane  
305 potential did not change for the remainder of the elevated  $[K^+]$  application (n.s.  
306 differences for all comparisons 15 minutes – 90 minutes  $2.5x[K^+]$ ). The minimum  
307 membrane potential returned to baseline levels when the preparations were returned to  
308 physiological saline (n.s. differences between all baseline and wash timepoints). The  
309 behavior of LP neurons in  $2.5x[K^+]$  was very similar to that of PD neurons; LP neurons  
310 depolarized by  $16.5 \pm 2.9mV$  after 10 minutes in  $2.5x[K^+]$  ( $n = 5$ ) and remained  
311 depolarized for the duration of the elevated  $[K^+]$  application.

312 Although pyloric activity and circuit connectivity are highly conserved across  
313 animals, responses of individual PD neurons to  $2.5x[K^+]$  saline varied substantially  
314 across animals.  $2.5x[K^+]$  saline led to a period of silence in 9 of 13 PD neurons, with a  
315 large variability in the duration of silence and extent of recovery across animals ( $N =$



316 13). The duration of silence of the PD neurons elicited by  $2.5x[K^+]$  saline application  
317 varied from 1 to 62 minutes ( $10.9 \pm 5.8$  minutes SD).

318 We were interested to see whether aspects of baseline activity of each PD neuron  
319 influenced the neuron's time to recovery. Therefore, for each PD neuron, we calculated  
320 the mean minimum membrane potential during baseline recordings, the change in  
321 membrane potential upon application of  $2.5x[K^+]$  saline, and the baseline bursting  
322 frequency. We found no correlation between any of these values and silence duration for  
323 a given PD neuron in  $2.5x[K^+]$  saline ( $R^2=0.203$ ,  $R^2=0.104$ ,  $R^2=0.012$  respectively).

324

325 ***PD neurons in the isolated pacemaker kernel continue spiking in  $2.5x[K^+]$***   
326 ***saline***

327 From the previous experiments, it was unclear to what extent the crash and  
328 recovery of activity in  $2.5x[K^+]$  saline was impacted by presynaptic inputs to the PD  
329 neurons. The only feedback from the rest of the pyloric circuit to the pacemaker  
330 ensemble is the glutamatergic inhibitory input from the LP neuron (Eisen and Marder,  
331 1982). Thus, the pacemaker kernel can be studied in isolation from the other pyloric  
332 neurons by superfusing saline with  $10^{-5}M$  picrotoxin (PTX), which blocks ionotropic  
333 glutamatergic synapses in the STG (Fig. 3A)(Bidaut, 1980) .

334 The response of PD neurons to  $2.5x[K^+]$  saline in the presence of PTX was  
335 markedly different from the behavior of PD neurons in the absence of PTX. Figure 3  
336 illustrates a representative example of the activity of a PD neuron in  $2.5x[K^+]$  PTX  
337 saline. The neuron initially switched from rhythmic bursting to tonic spiking activity in  
338  $2.5x[K^+]$  PTX saline (Fig. 3Biii), followed by recovery of bursting activity that became  
339 more pronounced with time (Fig. 3Biv – vi). There was no interruption of spiking

340 activity in PD neurons upon the superfusion of 2.5x[K<sup>+</sup>] PTX saline (Fig. 3C) as  
341 compared to 2.5x[K<sup>+</sup>] alone (compare to Fig. 2B). The recovery of bursting activity in  
342 2.5x[K<sup>+</sup>] PTX saline can also be seen in the emergence of two distinct ISI bands (Fig.  
343 3D) and the emergence of a clear frequency band in the spectrogram of the PD  
344 intracellular voltage trace (Fig. 3E).

345 We further quantified the responses of PD neurons to 2.5x[K<sup>+</sup>] PTX saline by  
346 calculating the mean minimum membrane potential in five-minute bins for each neuron  
347 across the experiment (N = 8, Fig. 3F). Similar to PD neurons in the intact circuitry, all  
348 PD neurons in PTX depolarized in 2.5x[K<sup>+</sup>] saline (Fig. 3G, one-way repeated measures  
349 ANOVA,  $F(26,182) = 82.40$ , Tukey post-hoc, all  $p < 0.05$ , mean depolarization after 10  
350 minutes  $12.6 \pm 3.0\text{mV}$ ). The minimum membrane potential of PD neurons in PTX then  
351 remained stable until the end of the application of 2.5x[K<sup>+</sup>] and hyperpolarized back to  
352 baseline levels when returned to physiological [K<sup>+</sup>] saline (Fig. 3G, n.s. differences  
353 between all baseline and wash timepoints).

354

### 355 ***Synaptic inputs alter response of PD neurons to 2.5x[K<sup>+</sup>] saline***

356 The activity of PD neurons upon initial 2.5x[K<sup>+</sup>] saline application differed in the  
357 presence or absence of PTX, which indicates existence of a circuit-driven response to  
358 elevated [K<sup>+</sup>] saline. To quantify this effect, we used values from the Hartigan's dip test  
359 calculated from 2-minute bin log(ISI) distributions to determine the time that each PD  
360 neuron was either bursting, tonically firing, sparsely spiking, or silent throughout the  
361 experiment and plotted the assigned category for each PD neuron over time (see  
362 methods).

363 In the intact circuit, the majority (N = 9 of 13) of PD neurons exhibited a period  
364 of silence of at least 2 minutes following the application of 2.5x[K<sup>+</sup>] saline, then  
365 recovered spiking activity over a variable amount of time (Fig. 4A). In 2.5x[K<sup>+</sup>] PTX  
366 saline, PD neurons either remained active or only briefly went silent, then demonstrated  
367 robust recovery of spiking or bursting activity (Fig. 4B). The average time of PD silence  
368 in 2.5x[K<sup>+</sup>] saline was significantly less with the addition of PTX (Fig. 4C, Wilcoxon  
369 rank-sum test  $p = 0.013$ ), as was the average time of PD sparse firing between PTX and  
370 control PD neurons (Fig. 4D, Wilcoxon rank-sum test,  $p = 0.034$ ). In both the duration  
371 of silence and sparse firing states, there is one PD neuron that spent substantially more  
372 time in either of these states; however, removing this point did not affect the statistical  
373 differences between the control and PTX groups.

374 Neither the differences in average time of tonic firing (Fig. 4E, Wilcoxon rank-  
375 sum test,  $p = 0.77$ ), nor the differences in average time of bursting activity were  
376 statistically significant in the presence or absence of PTX (Fig. 4F, Wilcoxon rank-sum  
377 test,  $p = 0.51$ ) in 2.5x[K<sup>+</sup>] saline.

378

### 379 **Graded synaptic currents between the LP and PD neurons do not change** 380 **substantially over time in 2.5x[K<sup>+</sup>]**

381 STG neurons release neurotransmitter as a graded function of presynaptic  
382 membrane potential (Graubard, 1978; Manor et al., 1997), with a release threshold close  
383 to the trough of the slow wave seen during normal activity. PD neurons temporarily lose  
384 and then regain spiking activity in 2.5x[K<sup>+</sup>]. One possible explanation for these results is  
385 that graded presynaptic inhibition from the LP neuron, which also temporarily lose  
386 activity, onto the PD neuron decreases over time in 2.5x[K<sup>+</sup>] saline, allowing spiking

387 activity to re-appear. We were interested specifically in the role of graded inhibition,  
388 because the recovery of spiking activity in PD neurons typically occurs while the rest of  
389 the pyloric network is silent.

390 To test this, we measured the strength of the LP to PD and PD to LP synapses  
391 over time in TTX control saline and in 2.5x[K<sup>+</sup>] TTX saline. We measured the synaptic  
392 amplitudes in two ways, first using two-electrode current clamp (N = 3) and then using  
393 two-electrode voltage clamp (N=3). Both techniques consistently showed that there is  
394 no decrease in graded synaptic transmission during adaptation to high extracellular  
395 [K<sup>+</sup>]. Figure 5 summarizes the results of the voltage-clamp experiments. In 2.5x[K<sup>+</sup>]  
396 TTX saline there was a large decrease in the graded synaptic current from LP to PD  
397 measured at -10mV (Fig. 5A). This decrease in synaptic current can be accounted for by  
398 the increase in extracellular [K<sup>+</sup>] leading to a depolarization of the synaptic reversal  
399 potential. The magnitude of the synaptic current in 2.5x[K<sup>+</sup>] saline did not weaken over  
400 time, and in the example shown, slightly increased (Fig. 5B), indicating that the recovery  
401 is not likely a result of transmitter depletion. In all 6 experiments, there was no decrease  
402 in the LP to PD synapse strength over time in 2.5x[K<sup>+</sup>] saline (Fig. 5C (*voltage clamp*)).

403 In voltage clamp, we also measured the strength of graded synaptic transmission  
404 from the PD neuron to LP neuron (Fig. 5D). The magnitude of the synaptic current also  
405 decreased markedly upon application of 2.5x[K<sup>+</sup>] saline (again because the reversal  
406 potential depolarized) and remained low throughout the application (Fig 5E). This effect  
407 was consistent across all preparations (Fig. 5F). Thus, decreased graded inhibition  
408 cannot account for the recovery of spiking activity in pyloric neurons over time in  
409 elevated [K<sup>+</sup>] saline.

410

411 ***Intrinsic excitability of PD neurons changes rapidly during exposure to***  
412 ***2.5x[K<sup>+</sup>] saline***

413 To confirm that the periods of silence in high K<sup>+</sup> were not due to depolarization  
414 block, we applied 60-second steady ramps of current from -4nA to +2nA to PD neurons  
415 at several time points during the period of silence elicited by application of 2.5x[K<sup>+</sup>]  
416 saline. In silent PD neurons, action potentials could always be induced by injecting  
417 positive current, indicating that this period of silence is not due to depolarization block  
418 (Fig. 6A, ramps at 5-minutes and 10-minutes).

419 To determine the excitability of PD neurons during application of 2.5x[K<sup>+</sup>], we  
420 repeated the slow current ramps from -4nA to +2nA at 5, 10, 20, 30, 40, 50, 60, 70, 80,  
421 and 90 minutes after the beginning of the 2.5x[K<sup>+</sup>] saline application in the presence or  
422 absence of PTX. In the representative example shown in Figure 6A, there was a clear  
423 change in the spike threshold and frequency of spikes elicited in the PD neuron by the  
424 current ramp as a function of time in 2.5x[K<sup>+</sup>] saline. As more time in 2.5x[K<sup>+</sup>] elapsed,  
425 more spikes were elicited at the same membrane potentials during the current ramp  
426 (Fig. 6B).

427 Similar to PD neurons in the intact circuitry, PD neurons in the presence of PTX  
428 also a more excitable over time in 2.5x[K<sup>+</sup>] saline. In the representative example shown  
429 in Figure 6C, although the PD neuron remained tonically active throughout the  
430 application of 2.5x[K<sup>+</sup>] saline, there was a shift in both the spike threshold and spike  
431 frequency during the ramps over time in 2.5x[K<sup>+</sup>]. Similar to the PD neuron in the intact  
432 circuitry (Fig. 6B), the firing rate of the PD neuron in PTX increased over time in  
433 2.5x[K<sup>+</sup>] at all membrane potentials during the ramps (Fig. 6D).

434 Figure 7 summarizes the changes in spike threshold and firing rate of PD neurons  
435 across all preparations as a function of time in 2.5x[K<sup>+</sup>] saline. In both control and PTX  
436 conditions, PD neuron spike threshold hyperpolarized over time in 2.5x[K<sup>+</sup>] saline (Fig.  
437 7A). For most of these neurons the greatest changes in firing rate and spike threshold  
438 occurred during the first 10 minutes of the 2.5x[K<sup>+</sup>] saline application, which is similar  
439 to the time in which most PD neurons recovered spiking activity in elevated [K<sup>+</sup>].  
440 Control PD neurons had significantly different spike thresholds between the 5-minute  
441 and the 30 through 90-minute time points in 2.5x[K<sup>+</sup>] saline and also between the 10-  
442 minute and the 70 through 90-minute time points in 2.5x[K<sup>+</sup>] saline (Fig. 7A, one-way  
443 repeated measures ANOVA, Tukey Post-Hoc test,  $F(14,56) = 19.99$ , all  $p < 0.05$ ). Across  
444 all PTX PD neurons there was a significant change in spike threshold between the 5-  
445 minute and 20 through 90 minute time points in 2.5x[K<sup>+</sup>] saline (Fig. 7A, one-way  
446 repeated measures ANOVA, Tukey Post-Hoc test,  $F(14,98) = 30.98$ , all  $p > 0.05$ ).

447 To visualize changes in PD neuron excitability and how this depends on both  
448 synaptic inputs and time in 2.5x[K<sup>+</sup>] saline, we calculated average Frequency-current  
449 (F-I) curves for all PD neurons at the beginning (5-minute ramp) and at the end (90-  
450 minute ramp) of the 2.5x[K<sup>+</sup>] saline application. Early in the application (5 minutes) of  
451 2.5x[K<sup>+</sup>], PTX PD neurons showed higher firing rates than control PD neurons (Fig 7B,  
452 purple lines, two-way repeated measures ANOVA,  $F(1,11) = 18.52$ ,  $p = 0.001$ ). This  
453 difference represents the initial effect of local inhibitory connections on neuronal  
454 excitability and is consistent with the fact that in the presence of PTX, neurons  
455 remained active upon application of 2.5x[K<sup>+</sup>], whereas control PD neurons typically lost  
456 spiking activity. There was a shift in the average F-I curve between the early (5-minute)  
457 and late (90-minute) time points in 2.5x[K<sup>+</sup>] saline (Fig. 7B solid lines, two-way

458 repeated measures ANOVA,  $F(1,4) = 23.04$ ,  $p = 0.009$ ) indicating an increase in  
459 excitability. This was also seen for PTX PD neurons in  $2.5x[K^+]$ . There was a statistically  
460 significant difference between the early (5-minute) and late (90-minute) PTX PD  
461 neuron F-I curves (Fig 7B dashed lines, two-way repeated measures ANOVA,  $F(1,7) =$   
462  $15.22$ ,  $p = 0.006$ ). Finally, by the end of the  $2.5x[K^+]$  application (90-minutes), there  
463 was no significant difference between the F-I curves of PD neurons in the presence or  
464 absence of PTX (Fig 7B red lines, two-way repeated measures ANOVA,  $F(1,11) = 1.42$ ,  $p$   
465  $= 0.258$ ).

## 466 **Discussion**

467 External solutions containing high extracellular  $[K^+]$  are commonly used to  
468 depolarize neurons and other tissues, often with the assumption that depolarization will  
469 be associated with an increase in neuronal activity. Some treatments with high  
470 extracellular  $[K^+]$  are done transiently, for short periods of time, whereas in other  
471 experiments, preparations are kept in high extracellular  $[K^+]$  for many hours. In this  
472 paper we demonstrate adaptations to high  $[K^+]$  that occur in minutes to hours, that  
473 could complicate the interpretation of some experiments that use elevated  $[K^+]$ .  
474 Moreover, the phenomena described here may also have implications for disease states  
475 in which high extracellular  $K^+$  concentrations are abruptly elevated for minutes, hours or  
476 days.

477 Figure 8 summarizes the core data and conclusions of this paper and illustrates  
478 the evolution of the changes in normal and high  $[K^+]$ . Most importantly, this schematic  
479 shows that the effects of high  $[K^+]$  are not stationary, but instead have an initial set of  
480 effects followed by an adaptation phase. This result suggests that researchers using  
481 other preparations should be alert to the possibilities of different short and long-term  
482 effects of changing extracellular  $K^+$  concentrations.

483

### 484 **Inhibitory effect of a depolarizing stimulus**

485 It is generally assumed that positive current or depolarization of a neuron's  
486 membrane potential will lead to an increase in neuronal activity and that extreme  
487 depolarizations can lead to loss of activity through depolarization block. However, we  
488 present a case in which depolarization due to elevated extracellular  $[K^+]$  instead leads to  
489 a transient network silence that is not due to depolarization block (Fig. 8, blue panels).



490 In the pyloric circuit, all local synaptic connections are inhibitory (Eisen and  
491 Marder, 1982; Miller and Selverston, 1982; Rosenbaum and Marder, 2018). Synaptic  
492 transmission in the STG is both graded and spike-mediated, meaning that action  
493 potentials are not required for inhibitory synapses to function (Graubard et al., 1980;  
494 Manor et al., 1997). Therefore, the observed decrease in both bursting and spiking  
495 activity in elevated extracellular  $[K^+]$  could be caused by global depolarization leading to  
496 increased inhibition that initially suppresses spiking and bursting activity. In support of  
497 this theory, elevated  $[K^+]$  did not have the same inhibitory effect on PD neurons with  
498 glutamatergic inhibitory synapses blocked compared to PD neurons with intact synaptic  
499 connections. We speculate that similar blockades of circuit activity could occur  
500 whenever synaptic inhibition is strengthened. Moreover, in studies of proprioceptive  
501 neurons of the blue crab and the muscle receptor organ of the crayfish, increased  $[K^+]$   
502 also has an inhibitory effect at concentrations not thought to cause a depolarization  
503 block (Malloy et al., 2017).

504

### 505 **Adaptation to global perturbation**

506 The PD/AB pacemaker unit of the pyloric circuit exhibited rapid adaptation to  
507 the disruptive stimulus of increased extracellular  $[K^+]$  (Fig. 8, pink panels). Although  
508 the triphasic pyloric rhythm was not fully restored in  $2.5x[K^+]$  saline, PD neurons  
509 exhibited rapid changes in excitability over several minutes, which corresponded to the  
510 recovery of spiking and, in many cases, bursting activity. This time course is similar to a  
511 fascinating series of homeostatic mechanisms in *Drosophila* that also occurs over  
512 several minutes (Frank et al., 2006).

513           The time course of adaptation in the present study contrasts with many examples  
514 of homeostatic plasticity in which loss of activity elicits changes in gene expression to  
515 restore activity that are thought to occur over hours to days (Desai et al., 1999; Cudmore  
516 and Turrigiano, 2004; Turrigiano, 2012). Such mechanisms can be induced by changes  
517 in extracellular  $[K^+]$ . Rat myenteric neurons cultured in elevated  $[K^+]$  serum for several  
518 days exhibit long-lasting changes in  $Ca^{2+}$  channel function (Franklin, 1992). Similarly,  
519 culturing rat hippocampal pyramidal cells in high  $[K^+]$  medium for several days leads to  
520 activation of calcium-dependent changes in the intrinsic excitability of the neurons that  
521 can be seen in changes in the input resistance and the resting membrane potential  
522 (O'Leary et al., 2010).

523           Changes in  $K^+$  channel densities are also associated with homeostatic regulation  
524 of neuronal activity. Depolarization of crustacean motor neurons with current pulses for  
525 several hours alters  $K^+$  channel densities in a cell-specific manner through a calcium-  
526 dependent mechanism (Golowasch et al., 1999). In addition, when inhibitory GABA  
527 receptors are blocked for several days in cerebellar granule cells, they maintain their  
528 responses to excitatory input by strengthening voltage-independent  $K^+$  conductances  
529 (Brickley et al., 2001). Adaptation to global perturbation over several hours to days is  
530 well described by computational models via calcium signals that influence expression  
531 levels of ion channels (O'Leary et al., 2014; O'Leary, 2018).

532           In the STNS, the upstream commissural ganglia and the esophageal ganglion  
533 release a wide range of neuromodulators onto the STG that affect excitability of cells and  
534 the pyloric rhythm (Marder and Bucher, 2007; Marder, 2012). Pyloric neurons in the  
535 STG also exhibit a form of long-term adaptation in response to removal of these  
536 modulatory inputs. Some preparations in which neuromodulatory inputs are removed

537 initially lose rhythmicity and gradually recover over the course of several days (Thoby-  
538 Brisson and Simmers, 1998, 2002; Luther et al., 2003; Gray and Golowasch, 2016; Gray  
539 et al., 2017). Nonetheless, when preparations remain active after removal of  
540 neuromodulatory inputs, they tend to maintain a level of activity similar to that shown  
541 in preparations that recover after losing activity (Hamood et al., 2015), suggesting that  
542 there may be a target activity level for the circuit.

543         The rapid adaptation of PD neurons in elevated extracellular  $[K^+]$  is most likely  
544 due to changes in cell intrinsic conductances (Fig. 8, pink panel). In crustacean motor  
545 neurons, cell-intrinsic changes in current densities have been shown to be modulated by  
546 second-messenger kinase pathways activated by global depolarization (Ransdell et al.,  
547 2012). Rapid changes in circuit state could also be influenced by neuromodulation, as  
548 the experiments in this study were conducted on the entire STNS, including connections  
549 from the upstream modulatory ganglia that were also exposed to elevated  $[K^+]$ .

550

### 551 **Variable responses to similar perturbations**

552         Within the STG, conductance densities and strengths of synaptic connections can  
553 vary 2 to 6 fold in magnitude between individuals (Schulz et al., 2006; Schulz et al.,  
554 2007; Goillard et al., 2009; Shruti et al., 2014; Temporal et al., 2014; Alonso and  
555 Marder, 2019). Variability in neuronal conductances underlying similar activity patterns  
556 has also been demonstrated across phyla (Swensen and Bean, 2005; Nelson and  
557 Turrigiano, 2008; Roffman et al., 2012; Tran et al., 2019). In addition, computational  
558 modeling of the pyloric network has revealed that multiple combinations of parameters  
559 can give rise to similar activity patterns (Goldman et al., 2001; Prinz et al., 2004; Taylor  
560 et al., 2009; O'Leary et al., 2014; Marder et al., 2015).

561 Circuits and individual neurons with apparently identical outputs under control  
562 conditions can present distinctly different responses to perturbation due to underlying  
563 differences in network parameters (Tang et al., 2012; Hamood and Marder, 2014;  
564 Haddad and Marder, 2018; Haley et al., 2018; Alonso and Marder, 2019). In this study  
565 we observed a range in the time course of the adaptive response to the same  
566 perturbation, which may suggest individual parameter differences that are not evident  
567 in control conditions. The application of elevated  $[K^+]$  saline to identified STG neurons  
568 provides additional evidence that differences in individual conductance parameters can  
569 influence responses to global perturbation (Alonso and Marder, 2019).

570

### 571 **Potential implications for disease states**

572 Hyperkalemia is associated with a number of human disease states. Chronic  
573 Kidney Disease (CKD) leads to increases in serum  $[K^+]$  up to three times the normal  
574 levels, directly affecting neuronal excitability and changes in neuronal properties  
575 (Krishnan and Kiernan, 2009; Arnold et al., 2014). Similarly, increased activity of a  
576 group of neurons can increase the extracellular  $[K^+]$  in the surrounding tissue (Baylor  
577 and Nicholls, 1969; Kříž et al., 1974) and epileptic seizures and brain trauma can lead to  
578 increases in  $[K^+]$  in surrounding brain regions (Moody et al., 1974; Katayama et al.,  
579 1990; Silver and Erecinska, 1994; Fröhlich et al., 2008). In this study we showed that  
580 changes in  $[K^+]$  similar to those reported in pathological conditions produce not only  
581 immediate change in the activity of STG motor neurons, but also long-lasting changes in  
582 the intrinsic properties of these neurons. Transient changes in extracellular  $[K^+]$  have  
583 been shown to cause long lasting changes in the organization and phosphorylation

584 pattern of K<sup>+</sup> channels (Misonou et al., 2004), which could lead to long-lasting changes  
585 in circuit function (Somjen, 2001, 2002; Rodgers et al., 2007).

586

### 587 **Reassessing global perturbation**

588         The results of this study highlight the lack of a consistent response to a seemingly  
589 simple perturbation. In this classical manipulation of increased extracellular [K<sup>+</sup>], we  
590 observed a paradoxical decrease in the activity of PD neurons upon bath application of  
591 high [K<sup>+</sup>], followed by a recovery of activity in a short period of time. Despite knowing  
592 the network connectivity, circuit properties and expected behavior of identified neurons  
593 within the STG, we were still unable to *a priori* predict or fully explain the effects of  
594 increased [K<sup>+</sup>] on circuit performance. The complex interaction between circuit level  
595 effects and cell intrinsic responses to simple changes in ion concentrations underscores  
596 the importance of assessing and reporting neuronal activity during such manipulations  
597 in any experiment.

## 598 **References**

- 599 Alonso LM, Marder E (2019) Visualization of currents in neural models with similar behavior and  
600 different conductance densities. *eLife* 8:e42722.
- 601 Arnold R, Pussell BA, Howells J, Grinius V, Kiernan MC, Lin CSY, Krishnan AV (2014) Evidence for  
602 a causal relationship between hyperkalaemia and axonal dysfunction in end-stage  
603 kidney disease. *Clinical Neurophysiology* 125:179-185.
- 604 Ballerini L, Galante M, Grandolfo M, Nistri A (1999) Generation of rhythmic patterns of activity  
605 by ventral interneurons in rat organotypic spinal slice culture. *J Physiol* 517:459-475.
- 606 Baylor DA, Nicholls JG (1969) Changes in extracellular potassium concentration produced by  
607 neuronal activity in the central nervous system of the leech. *J Physiol* 203:555-569.
- 608 Bidaut M (1980) Pharmacological dissection of pyloric network of the lobster stomatogastric  
609 ganglion using picrotoxin. *J Neurophysiol* 44:1089-1101.
- 610 Brickley SG, Revilla V, Cull-Candy SG, Wisden W, Farrant M (2001) Adaptive regulation of  
611 neuronal excitability by a voltage- independent potassium conductance. *Nature* 409:88-  
612 92.
- 613 Burg JP (1967) Maximum entropy spectral analysis. In: Proc. 37th Meeting Society of  
614 Exploration Geophysicist. Oklahoma City, OK.
- 615 Buttkus B (2000) Spectral Analysis and Filter Theory. Berlin: Springer.
- 616 Chauvette S, Soltani S, Seigneur J, Timofeev I (2016) In vivo models of cortical acquired epilepsy.  
617 *J Neurosci Methods* 260:185-201.
- 618 Cudmore RH, Turrigiano GG (2004) Long-term potentiation of intrinsic excitability in LV visual  
619 cortical neurons. *Journal of Neurophysiology* 92:341-348.

- 620 Desai NS, Rutherford LC, Turrigiano GG (1999) Plasticity in the intrinsic excitability of cortical  
621 pyramidal neurons. *Nat Neurosci* 2:515-520.
- 622 Eisen JS, Marder E (1982) Mechanisms underlying pattern generation in lobster stomatogastric  
623 ganglion as determined by selective inactivation of identified neurons. III. Synaptic  
624 connections of electrically coupled pyloric neurons. *J Neurophysiol* 48:1392-1415.
- 625 Frank CA, Kennedy MJ, Goold CP, Marek KW, Davis GW (2006) Mechanisms underlying the  
626 rapid induction and sustained expression of synaptic homeostasis. *Neuron* 52:663-677.
- 627 Franklin JL (1992) Long-term Regulation of Neuronal Calcium Currents by Prolonged Changes of  
628 Membrane Potential. *Journal of Neuroscience* 12:1726-1735.
- 629 Fröhlich F, Bazhenov M, Iragui-Madoz V, Sejnowski TJ (2008) Potassium dynamics in the  
630 epileptic cortex: new insights on an old topic. *The Neuroscientist* 14:422-433.
- 631 Goillard J-M, Taylor AL, Schulz DJ, Marder E (2009) Functional consequences of animal-to-  
632 animal variation in circuit parameters. *Nat Neurosci* 12:1424-1430.
- 633 Goldman MS, Golowasch J, Marder E, Abbott L (2001) Global structure, robustness, and  
634 modulation of neuronal models. *Journal of Neuroscience* 21:5229-5238.
- 635 Golowasch J, Abbott LF, Marder E (1999) Activity-dependent regulation of potassium currents  
636 in an identified neuron of the stomatogastric ganglion of the crab *Cancer borealis*.  
637 *Journal of Neuroscience* 19:RC33-RC33.
- 638 Golowasch J, Goldman MS, Abbott LF, Marder E (2002) Failure of averaging in the construction  
639 of a conductance-based neuron model. *J Neurophysiol* 87:1129-1131.
- 640 Graubard K (1978) Synaptic transmission without action potentials: input-output properties of a  
641 non-spiking presynaptic neuron. *J Neurophysiol* 41:1014-1025.

- 642 Graubard K, Raper JA, Hartline DK (1980) Graded synaptic transmission between spiking  
643 neurons. Proc Natl Acad Sci USA 77:3733-3735.
- 644 Gray M, Golowasch J (2016) Voltage dependence of a neuromodulator-activated ionic current.  
645 eNeuro 3(2).
- 646 Gray M, Daudelin DH, Golowasch J (2017) Activation mechanism of a neuromodulator-gated  
647 pacemaker ionic current. Journal of neurophysiology 118:595-609.
- 648 Gutierrez GJ, Grashow RG (2009) *Cancer borealis* stomatogastric nervous system dissection. In:  
649 J Vis Exp, 2009/03/25 Edition.
- 650 Haddad SA, Marder E (2018) Circuit robustness to temperature perturbation is altered by  
651 neuromodulators. Neuron 100:609-623.
- 652 Haley JA, Hampton D, Marder E (2018) Two central pattern generators from the crab, *Cancer*  
653 *borealis*, respond robustly and differentially to extreme extracellular pH. eLife 7:e41877.
- 654 Hamood AW, Marder E (2014) Animal-to-Animal Variability in Neuromodulation and Circuit  
655 Function. Cold Spring Harbor Symposia on Quantitative Biology 79:21-28.
- 656 Hamood AW, Haddad SA, Otopalik AG, Rosenbaum P, Marder E (2015) Quantitative  
657 reevaluation of the effects of short- and long-term removal of descending modulatory  
658 inputs on the pyloric rhythm of the crab, *Cancer borealis*. eNeuro 2:0058-0014.
- 659 Harris-Warrick RM (2010) General principles of rhythmogenesis in central pattern generator  
660 networks. In: Progress in Brain Research, pp 213-222: Elsevier.
- 661 Hartigan JA, Hartigan PM (1985) The dip test of unimodality. The annals of Statistics 13:70-84.



- 662 Hartline DK, Gassie DV, Jr. (1979) Pattern generation in the lobster (*Panulirus*) stomatogastric  
663 ganglion. I. Pyloric neuron kinetics and synaptic interactions. *Biological Cybern* 33:209-  
664 222.
- 665 Hooper SL, Thuma JB, Guschlbauer C, Schmidt J, Büschges A (2015) Cell dialysis by sharp  
666 electrodes can cause nonphysiological changes in neuron properties. *Journal of*  
667 *neurophysiology* 114:1255-1271.
- 668 Jensen MS, Yaari Y (1997) Role of intrinsic burst firing, potassium accumulation, and electrical  
669 coupling in the elevated potassium model of hippocampal epilepsy. *J Neurophysiol*  
670 77:1224-1233.
- 671 Katayama Y, Becker DP, Tamura T, Hovda DA (1990) Massive increases in extracellular  
672 potassium and the indiscriminate release of glutamate following concussive brain injury.  
673 *J Neurosurg* 73:889-900.
- 674 Krishnan AV, Kiernan MC (2009) Neurological complications of chronic kidney disease. *Nat Rev*  
675 *Neurol* 5:542.
- 676 Kříž N, Syková E, Ujec E, Vyklický L (1974) Changes of of extracellular potassium concentration  
677 induced by neuronal activity in the spinal cord of the cat. *J Physiol* 238:1-15.
- 678 Lin Y, Bloodgood BL, Hauser JL, Lapan AD, Koon AC, Kim T-K, Hu LS, Malik AN, Greenberg ME  
679 (2008) Activity-dependent regulation of inhibitory synapse development by Npas4.  
680 *Nature* 455:1198-1204.
- 681 Luther JA, Robie AA, Yarotsky J, Reina C, Marder E, Golowasch J (2003) Episodic bouts of activity  
682 accompany recovery of rhythmic output by a neuromodulator-and activity-deprived  
683 adult neural network. *Journal of neurophysiology* 90:2720-2730.

- 684 Malloy C, Dayaram V, Martha S, Alvarez B, Chukwudolue I, Dabbain N, Mahmood DD, Goleva S,  
685 Hickey T, Ho A (2017) The effects of potassium and muscle homogenate on  
686 proprioceptive responses in crayfish and crab. *J Exp Zool* 327:366-379.
- 687 Manor Y, Nadim F, Abbott L, Marder E (1997) Temporal dynamics of graded synaptic  
688 transmission in the lobster stomatogastric ganglion. *J Neurosci* 17:5610-5621.
- 689 Marder E (2012) Neuromodulation of neuronal circuits: back to the future. *Neuron* 76:1-11.
- 690 Marder E, Eisen JS (1984) Transmitter identification of pyloric neurons: electrically coupled  
691 neurons use different transmitters. *J Neurophysiol* 51:1345-1361.
- 692 Marder E, Calabrese RL (1996) Principles of rhythmic motor pattern generation. *Physiological*  
693 *Reviews* 76:687-717.
- 694 Marder E, Bucher D (2001) Central pattern generators and the control of rhythmic movements.  
695 *Curr Biol* 11:R986-R996.
- 696 Marder E, Goaillard JM (2006) Variability, compensation and homeostasis in neuron and  
697 network function. *Nat Rev Neurosci* 7:563-574.
- 698 Marder E, Bucher D (2007) Understanding circuit dynamics using the stomatogastric nervous  
699 system of lobsters and crabs. *Annu Rev Physiol* 69:291-316.
- 700 Marder E, Goeritz ML, Otopalik AG (2015) Robust circuit rhythms in small circuits arise from  
701 variable circuit components and mechanisms. *Curr Opin Neurobiol* 31:156-163.
- 702 Maynard DM (1972) Simpler networks. *Annals of the New York Academy of Sciences* 193:59-72.
- 703 Miller JP, Selverston AI (1982) Mechanisms underlying pattern generation in lobster  
704 stomatogastric ganglion as determined by selective inactivation of identified neurons.  
705 IV. Network properties of pyloric system. *J Neurophysiol* 48:1416-1432.

- 706 Misonou H, Mohapatra DP, Park EW, Leung V, Zhen D, Misonou K, Anderson AE, Trimmer JS  
707 (2004) Regulation of ion channel localization and phosphorylation by neuronal activity.  
708 Nat Neurosci 7:711-718.
- 709 Moody WJ, Jr. , Futamachi KJ, Prince DA (1974) Extracellular potassium activity during  
710 epileptogenesis. Experimental Neurology 42:248-263.
- 711 Morrison III B, Elkin BS, Dollé J-P, Yarmush ML (2011) In vitro models of traumatic brain injury.  
712 Ann Rev Biomed Engin 13:91-126.
- 713 Nelson SB, Turrigiano GG (2008) Strength through diversity. Neuron 60:477-482.
- 714 Norris BJ, Wenning A, Wright TM, Calabrese RL (2011) Constancy and variability in the output of  
715 a central pattern generator. J Neurosci 31:4663-4674.
- 716 O'Leary T, Williams AH, Franci A, Marder E (2014) Cell types, network homeostasis, and  
717 pathological compensation from a biologically plausible ion channel expression model.  
718 Neuron 82:809-821.
- 719 O'Leary T (2018) Homeostasis, failure of homeostasis and degenerate ion channel regulation.  
720 Current Opinion in Physiology 2:129-138.
- 721 O'Leary T, van Rossum MCW, Wyllie DJA (2010) Homeostasis of intrinsic excitability in  
722 hippocampal neurones: dynamics and mechanism of the response to chronic  
723 depolarization: Homeostatic regulation of intrinsic excitability. J Physiol 588:157-170.
- 724 Panaitescu B, Ruangkittisakul A, Ballanyi K (2009) Silencing by raised extracellular Ca<sup>2+</sup> of pre-  
725 Botzinger complex neurons in newborn rat brainstem slices without change of  
726 membrane potential or input resistance. Neurosci Lett 456:25-29.

- 727 Pérez-Pinzón M, Tao L, Nicholson C (1995) Extracellular potassium, volume fraction, and  
728 tortuosity in rat hippocampal CA1, CA3, and cortical slices during ischemia. *J*  
729 *Neurophysiol* 74:565-573.
- 730 Prinz AA, Bucher D, Marder E (2004) Similar network activity from disparate circuit parameters.  
731 *Nat Neurosci* 7:1345.
- 732 Ransdell JL, Nair SS, Schulz DJ (2012) Rapid homeostatic plasticity of intrinsic excitability in a  
733 central pattern generator network stabilizes functional neural network output. *J*  
734 *Neurosci* 32:9649-9658.
- 735 Rodgers CI, Armstrong GA, Shoemaker KL, LaBrie JD, Moyes CD, Robertson RM (2007) Stress  
736 preconditioning of spreading depression in the locust CNS. *PLoS One* 2:e1366.
- 737 Roffman RC, Norris BJ, Calabrese RL (2011) Animal-to-animal variability of connection strength  
738 in the leech heartbeat central pattern generator. *J Neurophysiol* 107:1681-1693.
- 739 Roffman RC, Norris BJ, Calabrese RL (2012) Animal-to-animal variability of connection strength  
740 in the leech heartbeat central pattern generator. *J Neurophysiol* 107:1681-1693.
- 741 Rosenbaum P, Marder E (2018) Graded transmission without action potentials sustains  
742 rhythmic activity in some but not all modulators that activate the same current. *J*  
743 *Neurosci* 38:8976-8988.
- 744 Ruangkittisakul A, Panaitescu B, Ballanyi K (2011) K<sup>+</sup> and Ca<sup>2+</sup> dependence of inspiratory-related  
745 rhythm in novel "calibrated" mouse brainstem slices. *Respir Physiol Neurobiol* 175:37-  
746 48.
- 747 Rybak IA, Molkov YI, Jasinski PE, Shevtsova NA, Smith JC (2014) Rhythmic Bursting in the Pre-  
748 Bötzing Complex. In: *Progress in Brain Research*, pp 1-23: Elsevier.

- 749 Schulz DJ, Goillard J-M, Marder E (2006) Variable channel expression in identified single and  
750 electrically coupled neurons in different animals. *Nat Neurosci* 9:356-362.
- 751 Schulz DJ, Goillard JM, Marder EE (2007) Quantitative expression profiling of identified  
752 neurons reveals cell-specific constraints on highly variable levels of gene expression.  
753 *Proc Natl Acad Sci U S A* 104:13187-13191.
- 754 Selverston AI, Miller JP (1980) Mechanisms underlying pattern generation in lobster  
755 stomatogastric ganglion as determined by selective inactivation of identified neurons. I.  
756 Pyloric system. *J Neurophysiol* 44:1102-1121.
- 757 Sharma N, Gabel Harrison W, Greenberg Michael E (2015) A Shortcut to Activity-Dependent  
758 Transcription. *Cell* 161:1496-1498.
- 759 Shruti S, Schulz DJ, Lett KM, Marder E (2014) Electrical coupling and innexin expression in the  
760 stomatogastric ganglion of the crab *Cancer borealis*. *Journal of neurophysiology*  
761 112:2946-2958.
- 762 Silver IA, Erecinska M (1994) Extracellular glucose concentration in mammalian brain:  
763 continuous monitoring of changes during increased neuronal activity and upon  
764 limitation in oxygen supply in normo-, hypo-, and hyperglycemic animals. *Journal of*  
765 *Neuroscience* 14:5068-5076.
- 766 Somjen GG (2001) Mechanisms of Spreading Depression and Hypoxic Spreading Depression-  
767 Like Depolarization. *Physiological Reviews* 81:1065-1096.
- 768 Somjen GG (2002) Ion Regulation in the Brain: Implications for Pathophysiology. *The*  
769 *Neuroscientist* 8:14.

- 770 Swensen AM, Bean BP (2005) Robustness of burst firing in dissociated Purkinje neurons with  
771 acute or long-term reductions in sodium conductance. *J Neurosci* 25:3509-3520.
- 772 Tang LS, Taylor AL, Rinberg A, Marder E (2012) Robustness of a rhythmic circuit to short- and  
773 long-term temperature changes. *J Neurosci* 32:10075-10085.
- 774 Tang LS, Goeritz ML, Caplan JS, Taylor AL, Fisek M, Marder E (2010) Precise temperature  
775 compensation of phase in a rhythmic motor pattern. *PLoS Biol* 8:e1000469.
- 776 Taylor AL, Goaillard J-M, Marder E (2009) How multiple conductances determine  
777 electrophysiological properties in a multicompartment model. *Journal of Neuroscience*  
778 29:5573-5586.
- 779 Temporal S, Lett KM, Schulz DJ (2014) Activity-dependent feedback regulates correlated ion  
780 channel mRNA levels in single identified motor neurons. *Curr Biol* 24:1899-1904.
- 781 Thoby-Brisson M, Simmers J (1998) Neuromodulatory inputs maintain expression of a lobster  
782 motor pattern-generating network in a modulation-dependent state: evidence from  
783 long-term decentralization in vitro. *Journal of Neuroscience* 18:2212-2225.
- 784 Thoby-Brisson M, Simmers J (2002) Long-Term Neuromodulatory Regulation of a Motor  
785 Pattern-Generating Network: Maintenance of Synaptic Efficacy and Oscillatory  
786 Properties. *Journal of Neurophysiology* 88:2942-2953.
- 787 Tran T, Unal CT, Severin D, Zaborszky L, Rotstein HG, Kirkwood A, Golowasch J (2019) Ionic  
788 current correlations are ubiquitous across phyla. *Scientific Reports* 9:1687.
- 789 Turrigiano G (2012) Homeostatic synaptic plasticity: local and global mechanisms for stabilizing  
790 neuronal function. *Cold Spring Harb Perspect Biol* 4:a005736.

791 Von Euler C (1983) On the central pattern generator for the basic breathing rhythmicity. Journal  
792 of Applied Physiology 55:1647-1659.  
793

794 FIGURE LEGENDS

795

796 **Figure 1. The pyloric rhythm is disrupted by large changes in extracellular**  
797 **[K<sup>+</sup>].** (A) Diagram of the dissected stomatogastric nervous system (STNS) showing the  
798 stomatogastric ganglion (STG) and motor nerves (*lvn*). The entire STNS was superfused  
799 with saline with altered [K<sup>+</sup>]. (B) The triphasic pyloric rhythm is illustrated in an  
800 extracellular recording from the *lvn*, which contains axons from LP, PY and PD neurons.  
801 (C) Connectivity diagram of the pyloric circuit of the crab *Cancer borealis*. All chemical  
802 synapses are inhibitory. Resistor symbols denote electrical synapses (D - G) Recordings  
803 of *lvn* spiking activity during application of elevated [K<sup>+</sup>] saline (green boxes) with  
804 concentrations 1.5x, 2.0x, 2.5x and 3.0x the physiological extracellular concentration of  
805 potassium.

806

807 **Figure 2. Activity of PD and LP neurons in 2.5x[K<sup>+</sup>] saline.** Green shaded boxes  
808 indicate the period of 2.5x[K<sup>+</sup>] saline superfusion. (A) Three-second segments of PD and  
809 LP activity are shown in physiological saline (i), 10 (ii), 20 (iii) and 70 (iv) minutes into  
810 application of 2.5x[K<sup>+</sup>] saline, and upon return to physiological saline (v). (B) Voltage  
811 trace of a PD neuron's activity for the entire representative experiment. (C) Interspike  
812 intervals (ISI) of the PD neuron's activity over the course of 2.5x[K<sup>+</sup>] saline application  
813 plotted on a log scale. (D) Spectrogram of the PD neuron's voltage trace. The color code  
814 represents the amplitude density, with red representing the maximum amplitude  
815 density and blue the minimum amplitude density. (E) Mean minimum membrane  
816 potential for each PD neuron in five-minute bins. (F) Average change in PD neurons'  
817 minimum membrane potential compared to baseline in five-minute bins. Error bars



818 represent standard deviations. Minimum membrane potential depolarized significantly  
819 when  $2.5x[K^+]$  saline was applied (One-way repeated measures ANOVA, Tukey post-  
820 hoc, all  $p < 0.05$ ), but did not change significantly between 10 and 90 minutes in  
821  $2.5x[K^+]$  (n.s., all  $p > 0.05$ ). The PD minimum membrane potential returned to baseline  
822 levels in wash (n.s., baseline compared to wash, all  $p > 0.05$ ).

823

824 **Figure 3. Activity of a PD neuron isolated from its presynaptic**

825 **glutamatergic synapses with picrotoxin (PTX) in  $2.5x[K^+]$  saline. (A)**

826 Connectivity diagram of the pyloric network with picrotoxin (PTX) blocking inhibitory  
827 glutamatergic synapses, and only cholinergic synapses still present. (B) Three-second  
828 segments of the PD neuron's activity in physiological saline (i), 20 min into application  
829 of  $10^{-5}M$  PTX saline (ii), at 10 (iii), 20 (iv) and 70 (v) minutes into application of  
830  $2.5x[K^+]$  PTX saline, and upon return to physiological saline (vi). (C) Voltage trace of the  
831 PD neuron over the entire experiment. The blue shaded boxes indicate time of  $10^{-5}M$   
832 PTX saline superfusion, and the green shaded box indicates the 90-minute period of  
833  $2.5x[K^+]$  PTX saline superfusion. Color scheme is maintained in D, F, and G. (D) ISIs  
834 from the PD neuron over the course of the experiment plotted on a log scale. (E)  
835 Spectrogram of PD neuron's voltage trace. The color code reflects the amplitude density.  
836 (F) Mean minimum membrane potential of each PTX PD neuron in five-minute bins.  
837 (G) Average change in PTX PD neurons' minimum membrane potential compared to  
838 baseline in five-minute bins. Error bars represent standard deviations. Minimum  
839 membrane potential depolarized significantly when  $2.5x[K^+]$  PTX saline was applied  
840 (One-way repeated measures ANOVA, Tukey post-hoc, all  $p < 0.05$ ) but does not change  
841 significantly after 10 minutes in  $2.5x[K^+]$  PTX for the duration of the elevated  $[K^+]$

842 application (n.s., all  $p > 0.05$ ). The minimum membrane potential returned to baseline  
843 levels in wash (n.s., baseline compared to wash, all  $p > 0.05$ ).

844

845 **Figure 4. PD neurons respond differently to  $2.5x[K^+]$  saline in the presence**

846 **and absence of PTX.** (A) Activity patterns (defined in methods and denoted by color

847 blocks) of control PD neurons exposed to  $2.5x[K^+]$  saline. Each line represents the

848 activity of a single PD neuron. (B) Activity patterns of PTX PD neurons exposed to

849  $2.5x[K^+]$  PTX saline. (C) Control PD neurons exhibit longer periods of silence (black)

850 upon  $2.5x[K^+]$  saline application compared to PD neurons in PTX (Wilcoxon rank-sum

851 test  $p = 0.0129$ ). (D) Control PD neurons exhibit longer periods of sparse firing (grey)

852 upon  $2.5x[K^+]$  saline application compared to PD neurons in PTX (Wilcoxon rank-sum

853 test  $p = 0.034$ ). (E) Control PD neurons do not show significant differences in the

854 amount of time in tonic firing (orange, n.s.,  $p = 0.77$ ) or in (F) burst firing (blue) modes

855 upon  $2.5x[K^+]$  saline application compared to PD neurons in PTX (n.s.,  $p = 0.51$ ).

856

857 **Figure 5. Graded synaptic currents between LP to PD neurons do not**

858 **change substantially over time in  $2.5x[K^+]$  saline.** Two-electrode voltage clamp

859 in both the LP and PD neurons. The PD neuron's membrane potential was clamped to

860 either  $-90mV$  or  $-10mV$  for 3 seconds while stepping the LP neuron from  $-50mV$  to  $-$

861  $10mV$  for 1 second. A-C show the synaptic currents from the LP neuron to the PD

862 neuron, with the PD neuron at  $-10mV$  and the LP neuron depolarized to  $-10mV$  (A)

863 Representative traces of the synaptic current in a PD neuron in response to the LP

864 neuron's depolarization over time in  $2.5x[K^+]$  and wash. (B) Maximum synaptic current

865 elicited in the PD neuron over the course of the entire experiment. (C) Change in

866 synaptic current relative to the last point measured in baseline. Individual experiments  
867 are shown in grey, the mean change in current is represented by the black line. D-F  
868 show the synaptic currents from the PD neuron to the LP neuron, with the LP neuron  
869 was held at -50mV and PD neuron depolarized to -10mV (D) Representative traces of  
870 the synaptic current in the LP neuron in response to the PD neuron's depolarization  
871 over time in 2.5x[K<sup>+</sup>] and wash. (E) Maximum synaptic current elicited in the LP neuron  
872 over the course of the entire experiment. (F) Change in synaptic current elicited in the  
873 LP neuron relative to the last point measured in baseline. Individual experiments are  
874 shown in grey, the mean change in current is represented by the black line.

875

876 **Figure 6. Excitability of representative PD neurons during exposure to**  
877 **2.5x[K<sup>+</sup>] saline.** Two-electrode current clamp was used to inject current ramps from -  
878 4nA to +2nA over 60 seconds. (A) Representative activity during ramps from a PD  
879 neuron in 2.5x[K<sup>+</sup>] at 5, 10, 40, and 80 minutes after the onset of 2.5x[K<sup>+</sup>] saline  
880 application. (B) Average firing rates calculated in 5-second bins for each ramp in  
881 2.5x[K<sup>+</sup>] saline from the neuron shown in A plotted against the average membrane  
882 potential of the corresponding bin. (C) Representative activity during ramps for a PD  
883 neuron in PTX saline at 5, 10, 40 and 80 minutes after the onset of 2.5x[K<sup>+</sup>] saline  
884 application. (D) Average firing rates calculated in 5-second bins for each ramp in  
885 2.5x[K<sup>+</sup>] saline from the neuron shown in C are plotted against the average membrane  
886 potential in the corresponding bin.

887

888 **Figure 7. Intrinsic excitability of PD neurons changes in 2.5x[K<sup>+</sup>] saline.**

889 (A) Spike thresholds (mean $\pm$ sem) for control and PTX PD neurons, calculated from  
890 60-second ramps from -4nA to +2nA. One-way repeated measures ANOVA with Tukey  
891 Post-Hoc test (\* =  $p < 0.05$ , all comparisons between brackets). (B) Average F-I curves  
892 for control PD neurons (solid lines) and PD neurons in PTX (dashed lines) in the  
893 beginning of 2.5x[K<sup>+</sup>] saline application(5-minute, blue lines) and at the end of 2.5x[K<sup>+</sup>]  
894 saline application (90-minute, red lines). There was a significant difference in the F-I  
895 curves of PTX and control PD neurons after 5 minutes in 2.5x[K<sup>+</sup>] saline (Two-way  
896 repeated measures ANOVA,  $p = 0.001$ ). Both control and PTX PD neurons become more  
897 excitable between the early (5-minute) and late (90-minute) time points in 2.5x[K<sup>+</sup>]  
898 (Two-way repeated measures ANOVA,  $p = 0.009$  and  $p = 0.006$  respectively).

899

900 **Figure 8. Schematic of possible mechanisms explaining the response to**  
901 **elevated [K<sup>+</sup>].** Boxes on the top row illustrate typical behavior of a PD neuron in  
902 control saline, early 2.5x[K<sup>+</sup>] saline (blue) and late 2.5x[K<sup>+</sup>] (pink). The initial loss of  
903 spiking activity in early 2.5x[K<sup>+</sup>] saline could potentially be explained by depolarization  
904 block, or by circuit mediated inhibition. Action potentials can be elicited in silent PD  
905 neurons by injecting positive current, showing that this silence is not due to  
906 depolarization block (Red X, trace from Fig. 6). PD neurons in early 2.5x[K<sup>+</sup>] saline do  
907 not lose spiking activity when inhibitory glutamatergic synapses are blocked, indicating  
908 that the initial silence can be explained by local inhibition from the LP neuron (Green ✓,  
909 traces from Fig. 2 and 3). The second phenomenon is the recovery of spiking and  
910 bursting activity late in 2.5x[K<sup>+</sup>] saline application. This recovery of spiking could be  
911 due to a reduction in graded inhibition over time and/or an increase in intrinsic  
912 excitability. Upon application of 2.5x[K<sup>+</sup>] saline, the response of PD neurons to LP

913 depolarization is greatly reduced, and slightly increases as time increases in 2.5x[K<sup>+</sup>]  
914 saline indicating that a change in synaptic inhibition is unlikely to be responsible for the  
915 recovery of spiking activity (Red X, traces from Fig. 5). Measurements of spike threshold  
916 and F-I curves from PD neurons late and early in 2.5x[K<sup>+</sup>] saline show that the intrinsic  
917 excitability of PD neurons increases over time (Green ✓, data from Fig. 7). This shift in  
918 excitability could be responsible for the recovery of spiking and rhythmic activity over  
919 time.

**A** Stomatogastric Nervous System

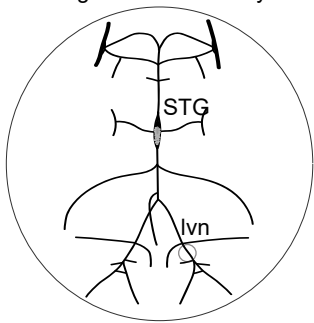

**B**

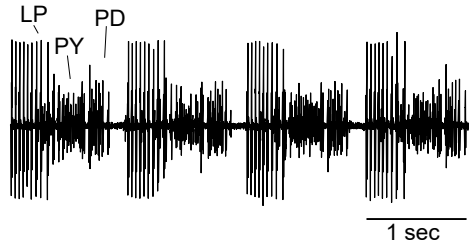

**C**

Intact pyloric circuit

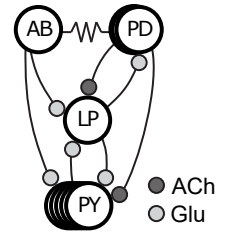

**D**

Normal saline

5 min in high  $[K^+]$  saline

30 min in high  $[K^+]$  saline

55 min in high  $[K^+]$  saline

10 min after washout of high  $[K^+]$  saline

1.5x $[K^+]$  saline

2x $[K^+]$  saline

2.5x $[K^+]$  saline

3x $[K^+]$  saline

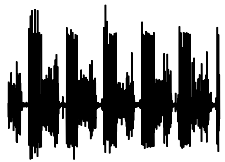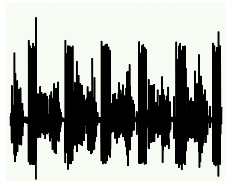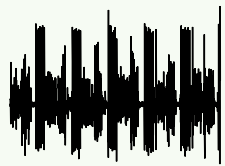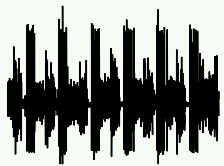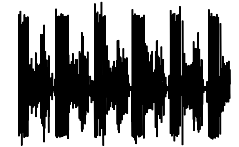

**E**

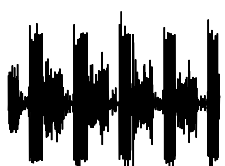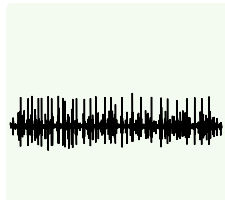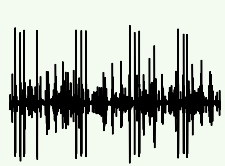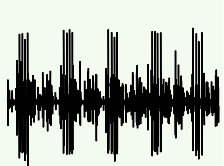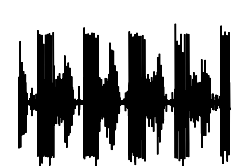

**F**

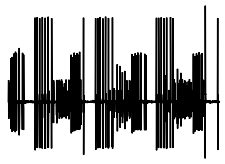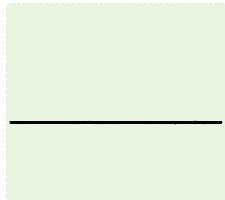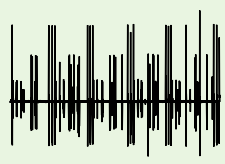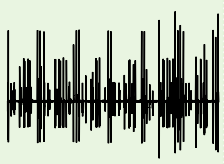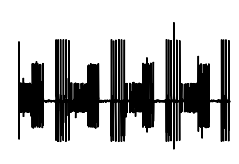

**G**

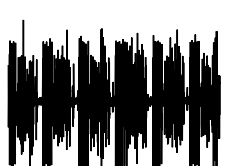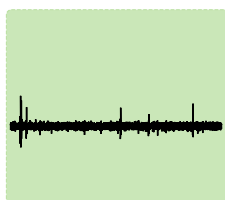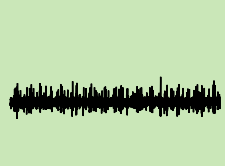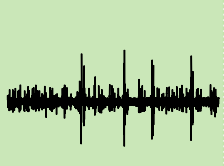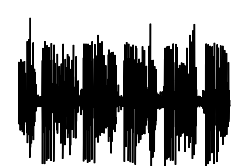

1 sec

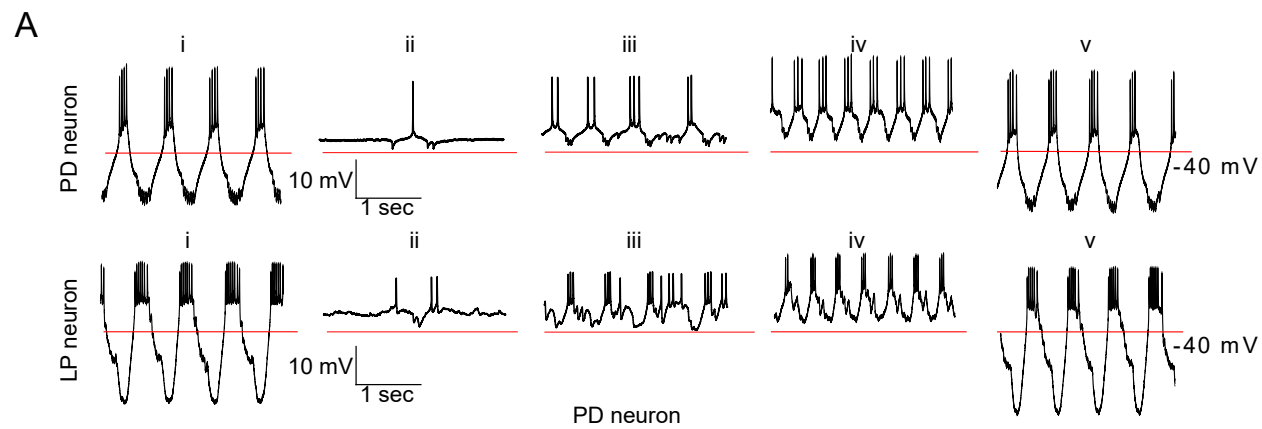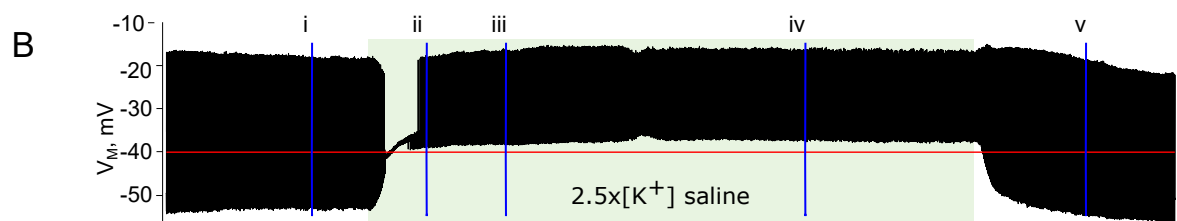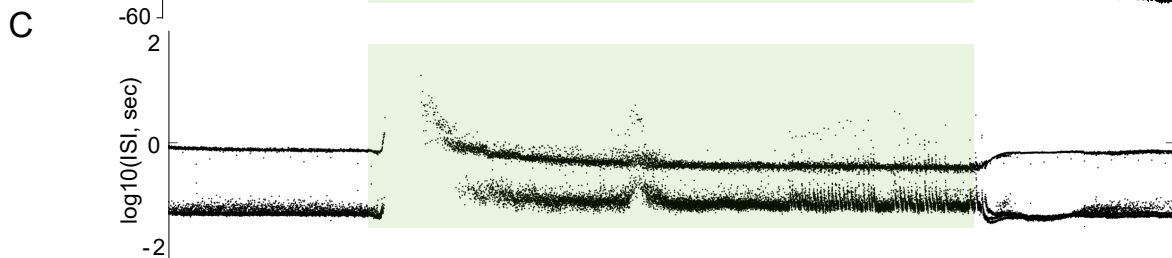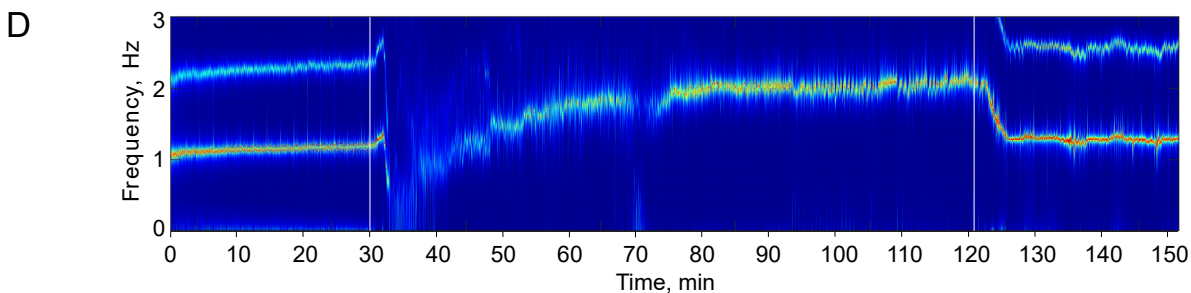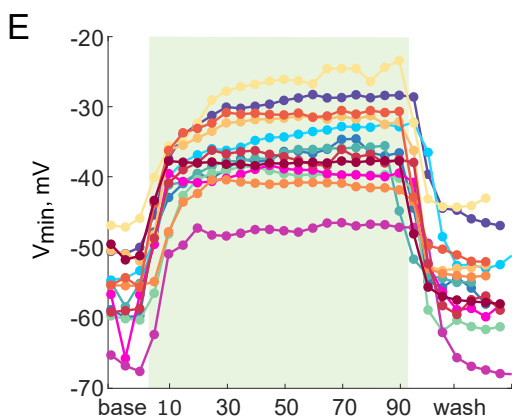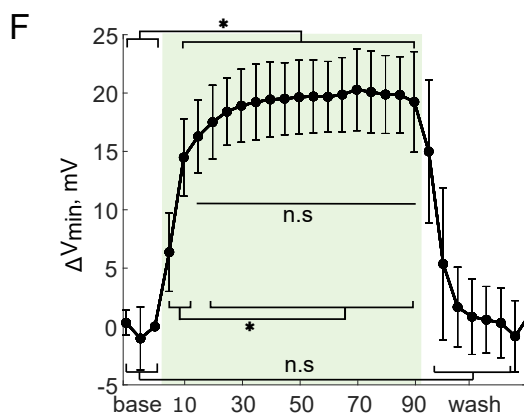

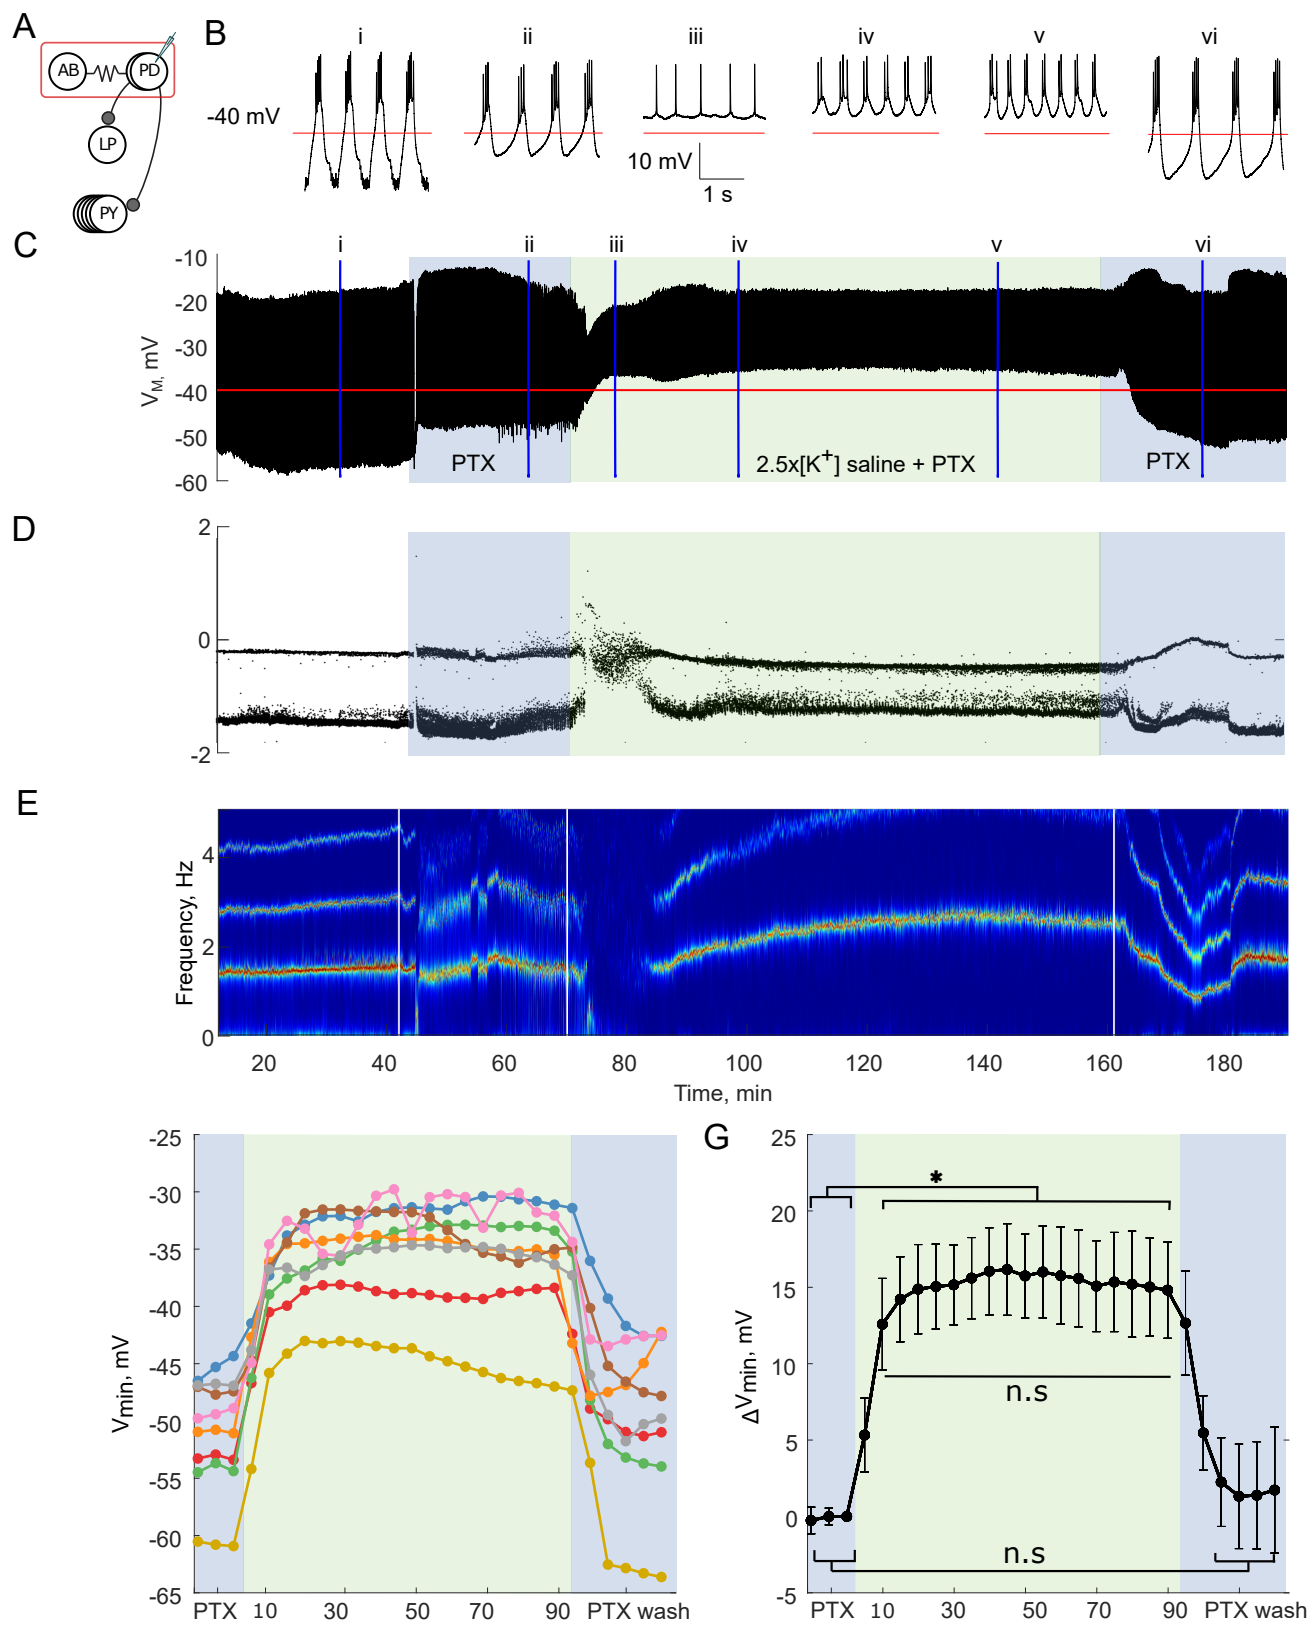



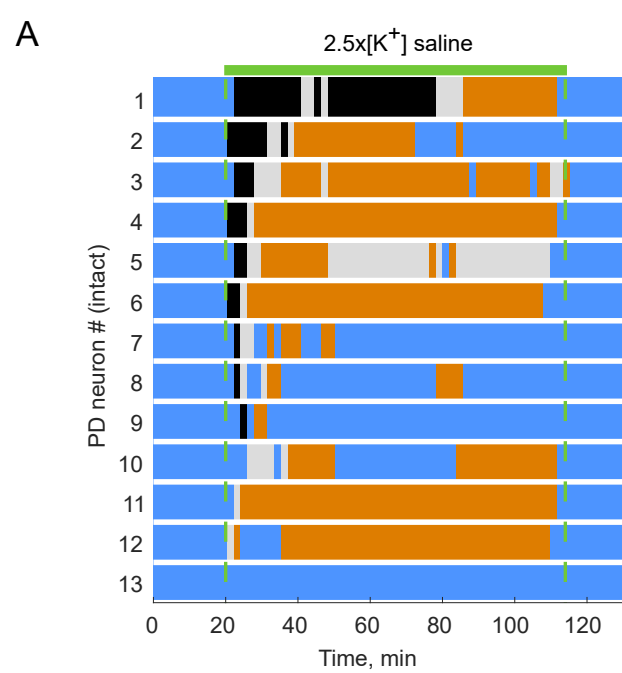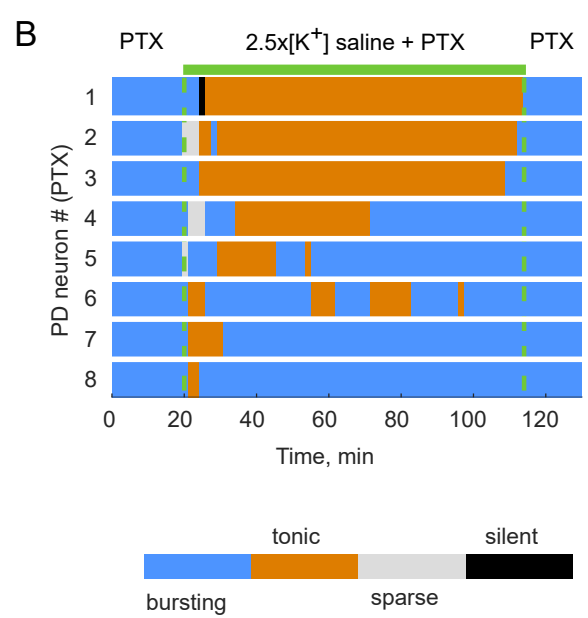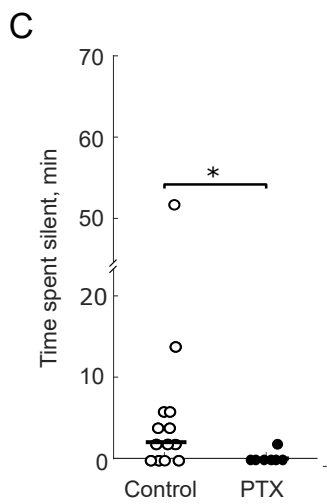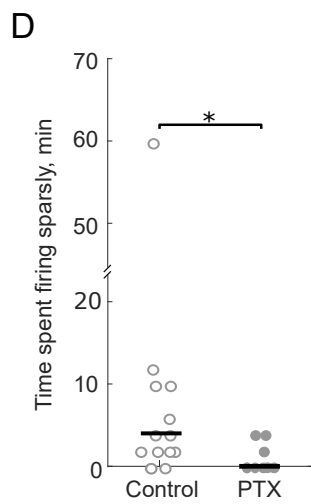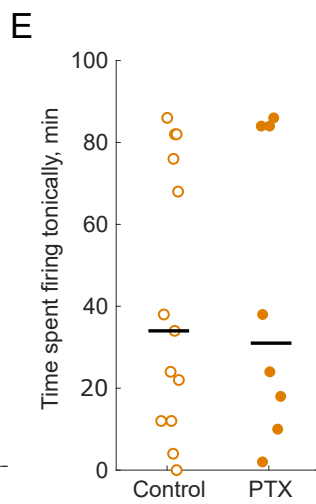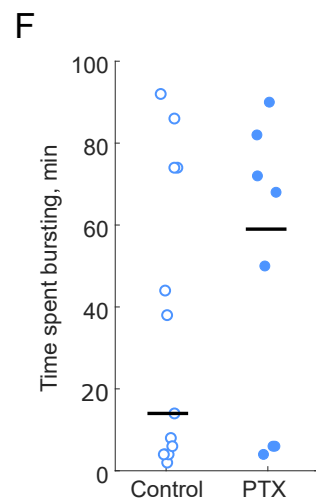

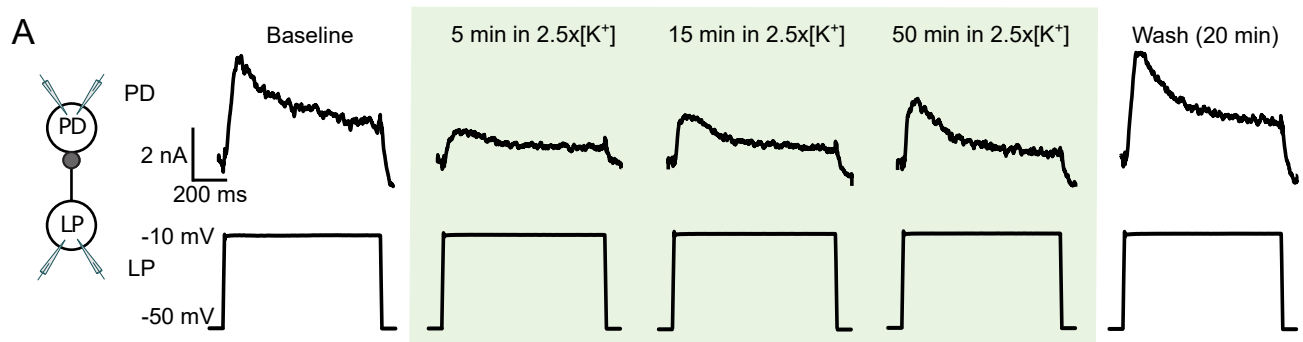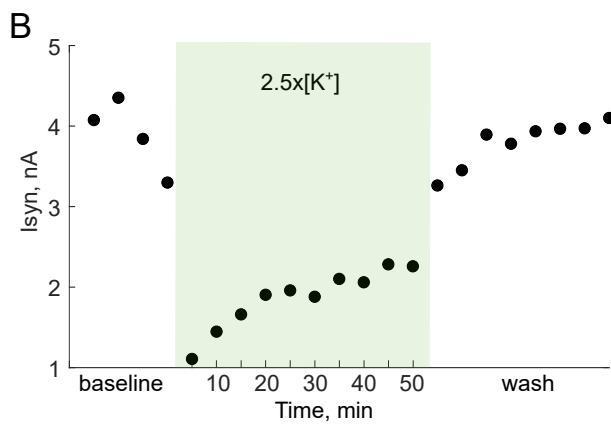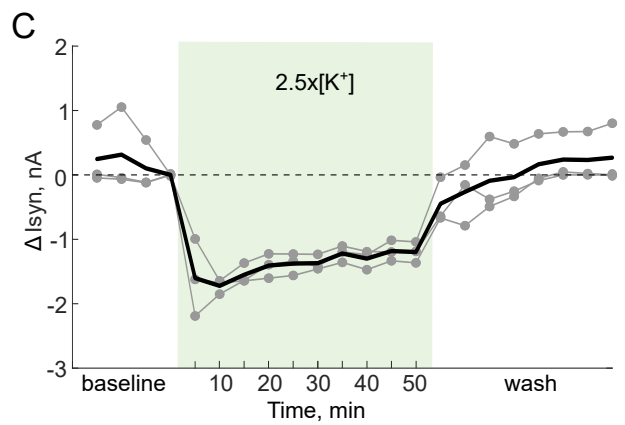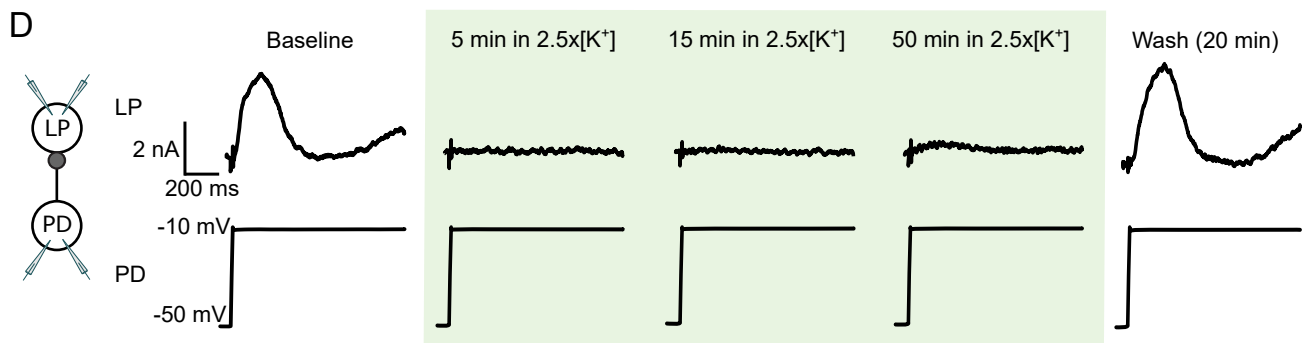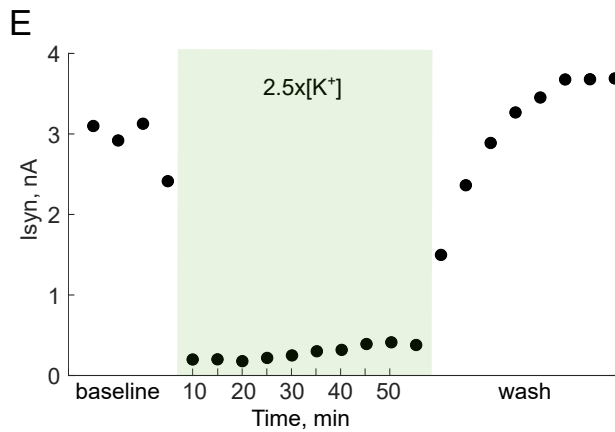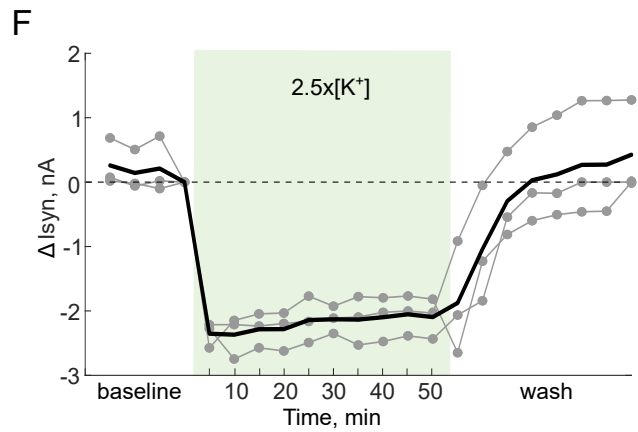

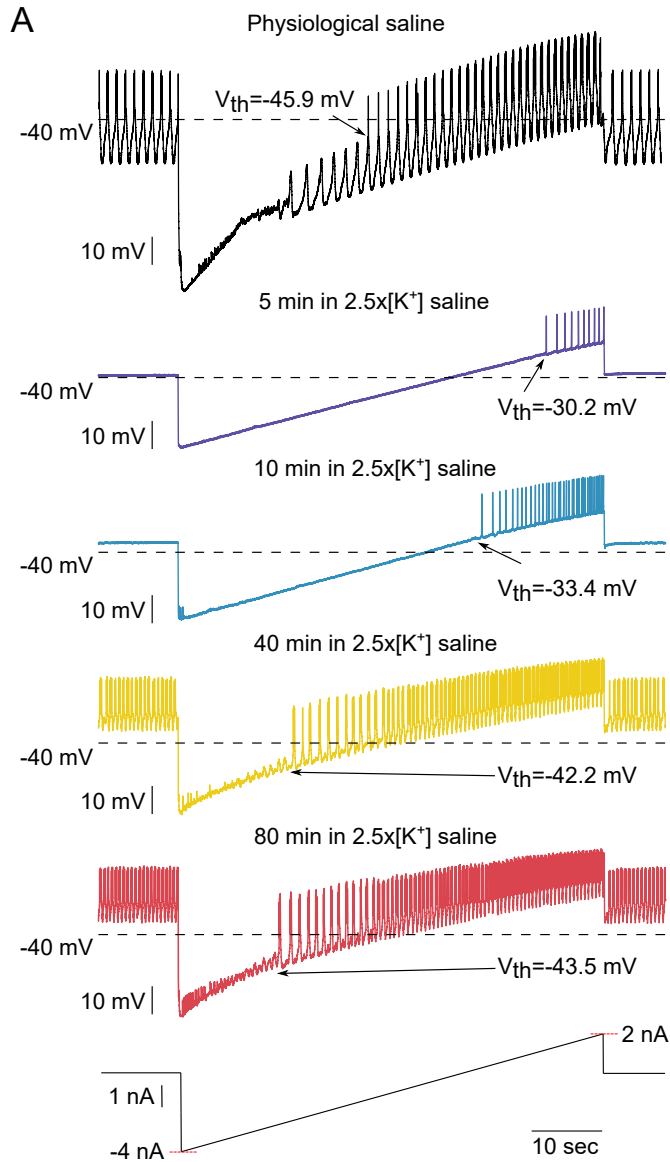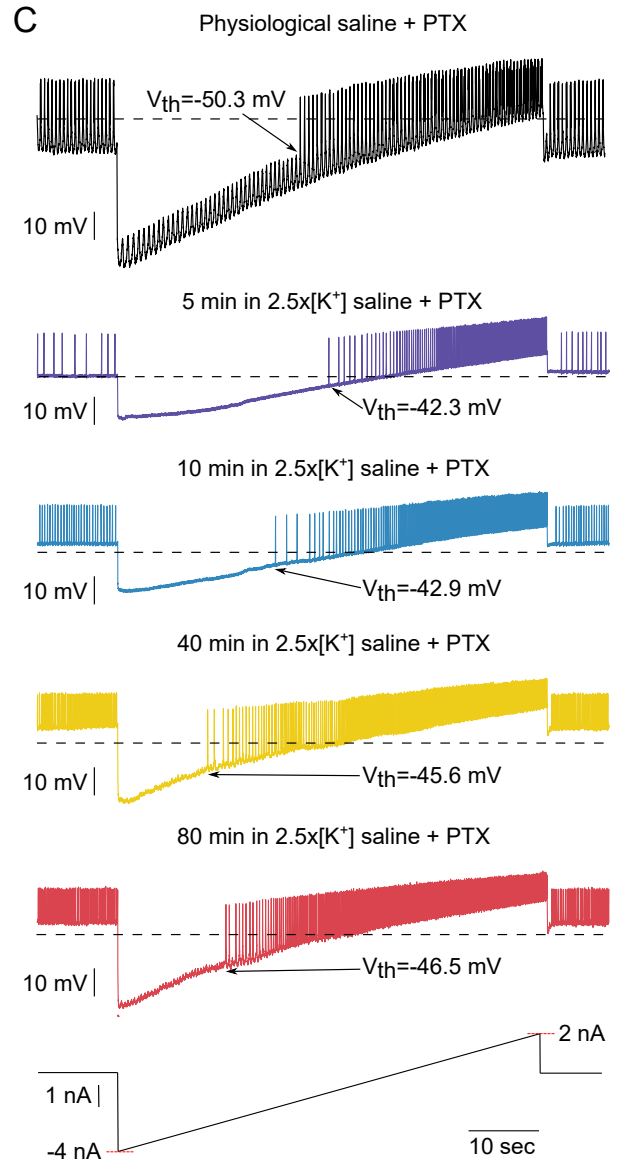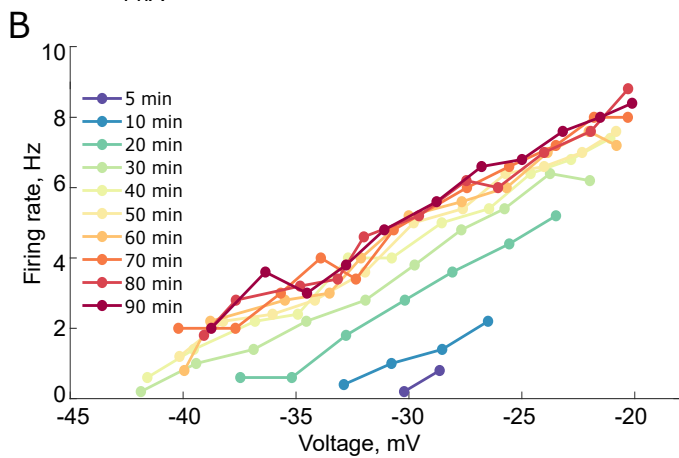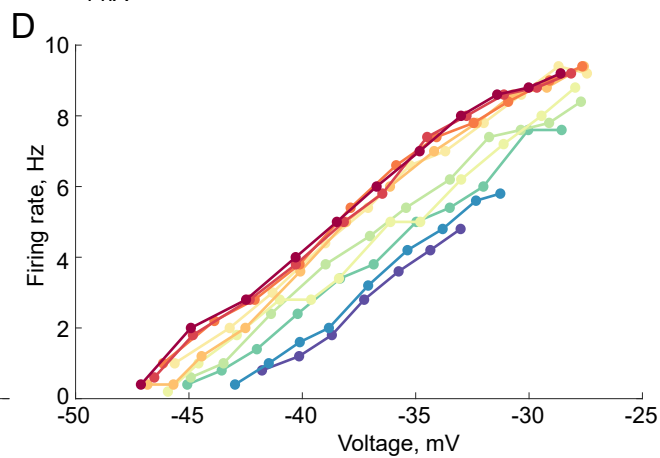

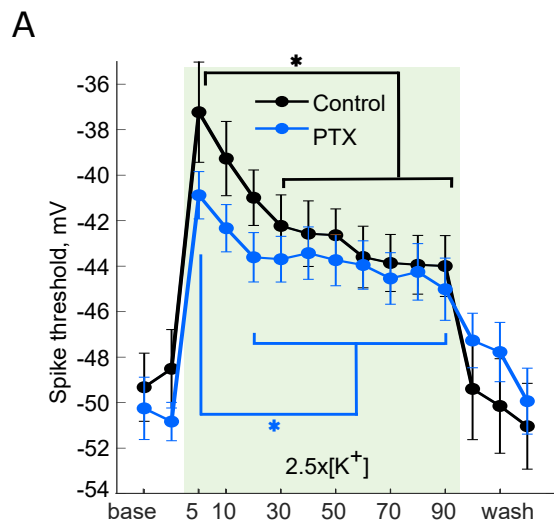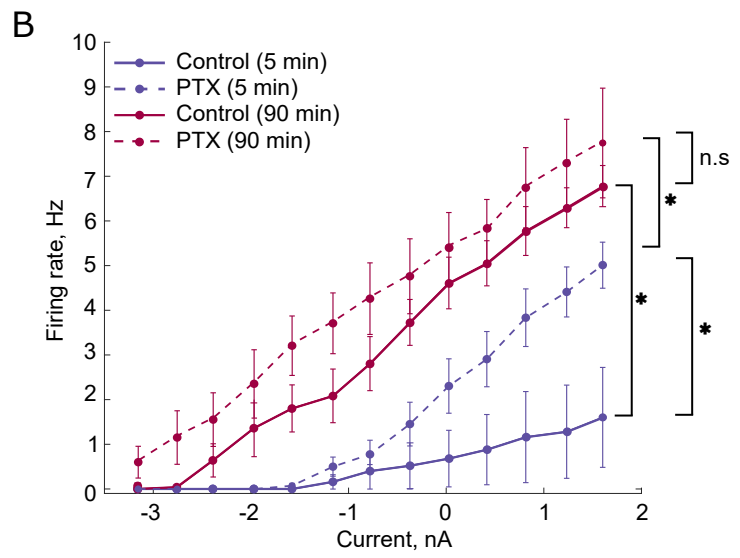

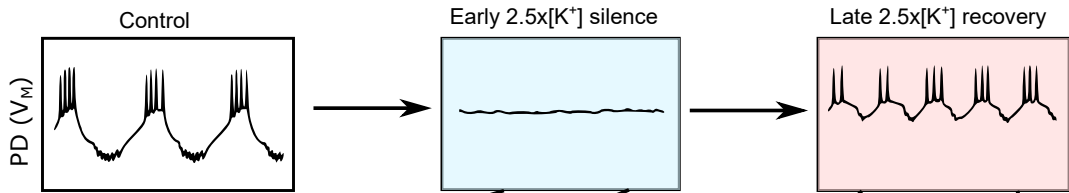

Depolarization block? ❌

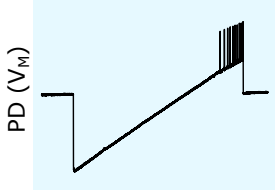

↑ Circuit effect (synaptic inhibition)? ✅

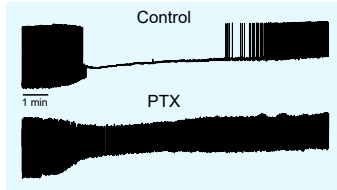

↓ Graded inhibition over time? ❌

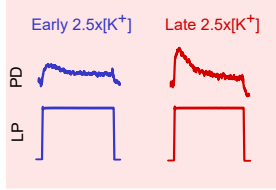

↑ Intrinsic excitability over time? ✅

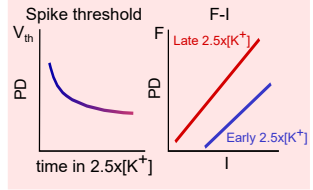

Source: https://www.biorxiv.org/content/10.1101/636910v2.full.pdf
